# Supplementary material for: Plant-associated CO2 mediates long-distance host location and foraging behaviour of a root herbivore
Source: eLife. 2021 Apr 20;10:e65575. doi: 10.7554/eLife.65575 (PMC8057813; doi:10.7554/eLife.65575)
Supplement: Figure 1—source data 1. [file elife-65575-fig1-data1.xlsx]

## Sheet: ControlSheet
	mCode	sep	yLow	yUp			Ribbon pointer
	2	1	0	9999			0

## Sheet: Figure 1CD
Tray	Distance	Plants	CO2 (ppm)
Blue	1	With plants	437
Blue	2	With plants	435
Blue	3	With plants	432
Blue	4	With plants	432
Blue	5	With plants	473
Blue	6	With plants	488
Blue	7	With plants	522
Blue	8	With plants	537
Blue	9	With plants	575
Blue	10	With plants	582
Blue	11	With plants	591
Red	1	With plants	420
Red	2	With plants	424
Red	3	With plants	426
Red	4	With plants	424
Red	5	With plants	421
Red	6	With plants	439
Red	7	With plants	475
Red	8	With plants	499
Red	9	With plants	484
Red	10	With plants	528
Red	11	With plants	551
Green	1	With plants	418
Green	2	With plants	417
Green	3	With plants	424
Green	4	With plants	421
Green	5	With plants	423
Green	6	With plants	454
Green	7	With plants	456
Green	8	With plants	484
Green	9	With plants	487
Green	10	With plants	534
Green	11	With plants	521
Blue	1	Plants removed	417
Blue	2	Plants removed	422
Blue	3	Plants removed	428
Blue	4	Plants removed	427
Blue	5	Plants removed	425
Blue	6	Plants removed	426
Blue	7	Plants removed	424
Blue	8	Plants removed	417
Blue	9	Plants removed	424
Blue	10	Plants removed	423
Blue	11	Plants removed	415
Red	1	Plants removed	427
Red	2	Plants removed	421
Red	3	Plants removed	426
Red	4	Plants removed	426
Red	5	Plants removed	421
Red	6	Plants removed	416
Red	7	Plants removed	422
Red	8	Plants removed	430
Red	9	Plants removed	427
Red	10	Plants removed	429
Red	11	Plants removed	428
Green	1	Plants removed	430
Green	2	Plants removed	420
Green	3	Plants removed	427
Green	4	Plants removed	430
Green	5	Plants removed	418
Green	6	Plants removed	420
Green	7	Plants removed	425
Green	8	Plants removed	409
Green	9	Plants removed	426
Green	10	Plants removed	432
Green	11	Plants removed	423
