# Supplementary material for: Plant-associated CO2 mediates long-distance host location and foraging behaviour of a root herbivore
Source: eLife. 2021 Apr 20;10:e65575. doi: 10.7554/eLife.65575 (PMC8057813; doi:10.7554/eLife.65575)
Supplement: Figure 2—source data 1. [file elife-65575-fig2-data1.xlsx]

## Sheet: ControlSheet
	mCode	sep	yLow	yUp			Ribbon pointer
	2	1	0	9999			0

## Sheet: Figure 2BCD
Sample	Relative gene expression of DvvGr1	Relative gene expression of DvvGr2	Relative gene expression of DvvGr3
Body	0.0225843	0.00608643	0.0025238
Body	0.0193901	0.0379386	0.00487565
Body	0.0173546	0.00781148	0.0053354
Body	0.00989877	0.0192341	0.00421518
Body	0.0227414	0.0145767	0.00439418
Body	0.0192562	0.0260931	0.00427403
Body	0.0314993	0.0303915	0.0283563
Body	0.0165327	0.0227153	0.00560066
Body	0.0138062	0.0301816	0.00848901
Body	0.0245432	0.02149	0.0070401
Head	0.122703	0.0800072	0.00285217
Head	0.0936386	0.089391	0.0175337
Head	0.106082	0.0789057	0.00790112
Head	0.0776563	0.0881603	0.00414697
Head	0.0949457	0.0881603	0.00876685
Head	0.123557	0.11159	0.00979508
Head	0.144912	0.103398	0.0414143
Head	0.143911	0.119599	0.0209962
Head	0.0613517	0.0726081	0.00806714
Head	0.0867644	0.0716084	0.00858643
