# Supplementary material for: Plant-associated CO2 mediates long-distance host location and foraging behaviour of a root herbivore
Source: eLife. 2021 Apr 20;10:e65575. doi: 10.7554/eLife.65575 (PMC8057813; doi:10.7554/eLife.65575)
Supplement: Figure 3—source data 1. [file elife-65575-fig3-data1.xlsx]

## Sheet: Fig. 3A
Gene silencing construct fed to larvae	DvvGR1 (Relative expression)	DvvGR2 (Relative expression)	DvvGR3 (Relative expression)
GFP	0.88444	1.20081	1.26862
GFP	1.05178	1.72191	1.12761
GFP	0.642976	0.29607	0.935147
GFP	1.45683	0.410089	1.42728
GFP	1.2949	1.66325	1.23393
GFP	1.00197	1.53051	2.2709
GFP	0.890592	0.164255	0.467574
GFP	0.395798	0.404443	0.591834
GFP	0.266616	0.533666	0.248836
GFP	1.25949	1.35098	0.684568
GFP	2.01788	1.93725	1.36914
GFP	0.836732	0.786767	0.374559
Gr1	0.337471	1.49901	3.34792
Gr1	0.171091	0.280099	1.26862
Gr1	0.138969	0.759967	1.20854
Gr1	0.113663	0.825883	1.60577
Gr1	0.154196	0.723973	1.57272
Gr1	0.146893	1.6066	1.52972
Gr1	0.302045	0.995856	1.28633
Gr1	0.257534	0.929166	0.332924
Gr1	0.218066	1.16797	0.665848
Gr1	0.0982661	0.34246	0.18728
Gr1	0.117672	0.261342	0.349476
Gr2	0.689125	0.049515	0.786362
Gr2	0.497524	0.127982	0.759576
Gr2	1.42685	0.289977	0.608473
Gr2	0.890592	0.149065	0.764859
Gr2	1.39749	0.161994	1.15931
Gr2	0.91563	0.266833	0.665848
Gr2	1.46697	0.0597055	0.575651
Gr2	3.98019	0.289977	2.41708
Gr2	1.5187	0.200825	1.8318
Gr2	1.5187	0.270558	0.62558
Gr2	0.634124	0.0657898	0.587746
Gr2	2.01788	0.138121	1.85738
Gr2	0.533233	0.111414	0.314965
Gr3	0.748896	0.480967	0.165312
Gr3	2.5365	1.46816	0.356819
Gr3	0.595774	0.310789	0.23705
Gr3	0.878331	0.955289	0.083231
Gr3	1.6277	0.759967	0.404235
Gr3	0.91563	1.99171	0.501133
Gr3	0.764632	0.0892508	0.0787414
Gr3	0.974569	0.968624	0.579655
Gr3	0.616784	0.65702	0.202117
Gr3	2.27023	1.32318	0.759576
Gr3	0.264775	0.808886	0.165312
Gr3	0.328243	0.709074	0.49082
Gr3	0.218066	0.252439	0.366851

## Sheet: Fig. 3B, Fig. 3-supp 1
Olfactometer side where air was sampled	CO2 (ppm)
Water side	364.063
Water side	386.418
Water side	377.905
Water side	422.358
Carbonated water side	553.966
Carbonated water side	442.317
Carbonated water side	469.106
Ambient air	361.872
Ambient air	460.685
Ambient air	369.183
Ambient air	393.763
Ambient air	392.72
Ambient air	382.351
Ambient air	403.956
Ambient air	390.719

## Sheet: Fig. 3C
	Larval choice (%)
Silencing construct fed to larvae	Water	Carbonated Water	No choice
GFP	16.6667	83.3333	0
GFP	50	50	0
GFP	33.3333	50	16.6667
GFP	16.6667	66.6667	16.6667
GFP	16.6667	50	33.3333
GFP	33.3333	50	16.6667
GFP	33.3333	66.6667	0
Gr1	33.3333	66.6667	0
Gr1	0	100	0
Gr1	16.6667	83.3333	0
Gr1	83.3333	16.6667	0
Gr1	33.3333	66.6667	0
Gr1	50	50	0
Gr1	0	100	0
Gr2	33.3333	66.6667	0
Gr2	50	50	0
Gr2	50	50	0
Gr2	66.6667	16.6667	16.6667
Gr2	33.3333	66.6667	0
Gr2	50	33.3333	16.6667
Gr2	83.3333	0	16.6667
Gr3	16.6667	83.3333	0
Gr3	50	33.3333	16.6667
Gr3	66.6667	16.6667	16.6667
Gr3	0	83.3333	16.6667
Gr3	50	50	0
Gr3	0	100	0
Gr3	0	100	0

## Sheet: Fig. 3E
	Larval choice (%)
Silencing construct fed to larvae	Root	Root+Methyl anthranilate	No choice
GFP	100	0	0
GFP	80	20	0
GFP	60	20	20
GFP	100	0	0
GFP	100	0	0
GFP	100	0	0
GFP	80	20	0
GFP	80	20	0
GFP	40	40	20
GFP	60	40	0
Gr2	80	20	0
Gr2	80	20	0
Gr2	100	0	0
Gr2	80	0	20
Gr2	80	20	0
Gr2	80	20	0
Gr2	60	40	0
Gr2	80	20	0
Gr2	80	20	0
Gr2	100	0	0

## Sheet: Fig. 3F
	Larval choice (%)
Silencing construct fed to larvae	Buffer	Buffer+Fe(III)(DIMBOA)3	No choice
GFP	16.6667	50	33.3333
GFP	16.6667	33.3333	50
GFP	33.3333	33.3333	33.3333
GFP	33.3333	33.3333	33.3333
GFP	16.6667	83.3333	0
GFP	0	66.6667	33.3333
GFP	0	100	0
GFP	16.6667	50	33.3333
GFP	16.6667	83.3333	0
GFP	16.6667	50	33.3333
GFP	33.3333	66.6667	0
GFP	16.6667	50	33.3333
GFP	33.3333	66.6667	0
GFP	33.3333	66.6667	0
GFP	33.3333	33.3333	33.3333
GFP	16.6667	50	33.3333
GFP	33.3333	66.6667	0
GFP	16.6667	50	33.3333
GFP	16.6667	50	33.3333
GFP	33.3333	66.6667	0
Gr2	16.6667	50	33.3333
Gr2	33.3333	66.6667	0
Gr2	33.3333	33.3333	33.3333
Gr2	16.6667	50	33.3333
Gr2	50	16.6667	33.3333
Gr2	16.6667	83.3333	0
Gr2	16.6667	66.6667	16.6667
Gr2	16.6667	83.3333	0
Gr2	33.3333	66.6667	0
Gr2	16.6667	50	33.3333
Gr2	16.6667	50	33.3333
Gr2	33.3333	66.6667	0
Gr2	50	50	0
Gr2	33.3333	50	16.6667
Gr2	50	50	0
Gr2	16.6667	83.3333	0
Gr2	0	66.6667	33.3333
Gr2	16.6667	50	33.3333
Gr2	33.3333	66.6667	0
Gr2	33.3333	66.6667	0

## Sheet: Fig. 3G
	Larval choice (%)
Silencing construct fed to larvae	Buffer	Sugar blend	No choice
GFP	16.6667	66.6667	16.6667
GFP	33.3333	33.3333	33.3333
GFP	16.6667	83.3333	0
GFP	33.3333	66.6667	0
GFP	33.3333	66.6667	0
GFP	16.6667	50	33.3333
GFP	16.6667	50	33.3333
GFP	33.3333	66.6667	0
GFP	33.3333	66.6667	0
GFP	16.6667	50	33.3333
GFP	50	16.6667	33.3333
GFP	16.6667	83.3333	0
GFP	33.3333	66.6667	0
GFP	33.3333	50	16.6667
GFP	33.3333	66.6667	0
GFP	16.6667	50	33.3333
GFP	16.6667	50	33.3333
GFP	33.3333	66.6667	0
GFP	33.3333	66.6667	0
GFP	16.6667	66.6667	16.6667
Gr2	16.6667	33.3333	50
Gr2	33.3333	33.3333	33.3333
Gr2	33.3333	33.3333	33.3333
Gr2	33.3333	50	16.6667
Gr2	50	50	0
Gr2	16.6667	83.3333	0
Gr2	16.6667	66.6667	16.6667
Gr2	16.6667	50	33.3333
Gr2	0	66.6667	33.3333
Gr2	16.6667	83.3333	0
Gr2	16.6667	83.3333	0
Gr2	33.3333	66.6667	0
Gr2	16.6667	50	33.3333
Gr2	33.3333	66.6667	0
Gr2	33.3333	33.3333	33.3333
Gr2	16.6667	50	33.3333
Gr2	16.6667	50	33.3333
Gr2	33.3333	66.6667	0
Gr2	50	50	0
Gr2	16.6667	50	33.3333
