# Supplementary material for: Plant-associated CO2 mediates long-distance host location and foraging behaviour of a root herbivore
Source: eLife. 2021 Apr 20;10:e65575. doi: 10.7554/eLife.65575 (PMC8057813; doi:10.7554/eLife.65575)
Supplement: Figure 4—source data 1. [file elife-65575-fig4-data1.xlsx]

## Sheet: Fig. 4B Fig. 4-fig supp 1
		Larval choice (%)				CO2 levels detected in each of the two olfactometer sides (ppm)
CO2 dose	Silencing construct fed to larvae	Air	CO2-enriched air	No choice		Air side	CO2-enriched air side	Delta CO2
D1	GFP	33.3333	33.3333	33.3333		512	533	21
D1	GFP	33.3333	50	16.6667		519	543	24
D1	GFP	50	50	0		502	523	21
D2	GFP	0	83.3333	16.6667		514	575	61
D2	GFP	0	100	0		522	584	62
D2	GFP	33.3333	66.6667	0		503	557	54
D3	GFP	16.6667	83.3333	0		524	730	206
D3	GFP	16.6667	66.6667	16.6667		530	738	208
D3	GFP	0	83.3333	16.6667		512	722	210
D4	GFP	50	50	0		528	784	256
D4	GFP	16.6667	66.6667	16.6667		533	794	261
D4	GFP	16.6667	66.6667	16.6667		517	774	257
D5	GFP	33.3333	50	16.6667		519	970	451
D5	GFP	33.3333	66.6667	0		522	977	455
D5	GFP	16.6667	50	33.3333		507	963	456
D6	GFP	50	33.3333	16.6667		537	1042	505
D6	GFP	33.3333	50	16.6667		546	1047	501
D6	GFP	33.3333	50	16.6667		528	1034	506
D7	GFP	50	33.3333	16.6667		505	1175	670
D7	GFP	66.6667	33.3333	0		511	1179	668
D7	GFP	50	50	0		496	1165	669
D8	GFP	66.6667	33.3333	0		512	1464	952
D8	GFP	50	33.3333	16.6667		514	1474	960
D8	GFP	83.3333	16.6667	0		498	1451	953
D9	GFP	66.6667	33.3333	0		508	1748	1240
D9	GFP	66.6667	16.6667	16.6667		509	1755	1246
D9	GFP	83.3333	0	16.6667		489	1741	1252
D10	GFP	83.3333	0	16.6667		530	2065	1535
D10	GFP	83.3333	16.6667	0		539	2068	1529
D10	GFP	66.6667	33.3333	0		518	2053	1535
D11	GFP	66.6667	16.6667	16.6667		516	2352	1836
D11	GFP	83.3333	0	16.6667		522	2354	1832
D11	GFP	83.3333	0	16.6667		507	2335	1828
D1	Gr2	33.3333	66.6667	0		506	519	13
D1	Gr2	50	50	0		504	531	27
D1	Gr2	33.3333	33.3333	33.3333		505	534	29
D2	Gr2	33.3333	50	16.6667		513	558	45
D2	Gr2	50	33.3333	16.6667		520	572	52
D2	Gr2	33.3333	50	16.6667		521	580	59
D3	Gr2	33.3333	50	16.6667		502	713	211
D3	Gr2	50	33.3333	16.6667		510	725	215
D3	Gr2	50	50	0		512	734	222
D4	Gr2	50	50	0		515	762	247
D4	Gr2	66.6667	16.6667	16.6667		523	776	253
D4	Gr2	50	33.3333	16.6667		528	781	253
D5	Gr2	50	33.3333	16.6667		501	951	450
D5	Gr2	33.3333	50	16.6667		505	969	464
D5	Gr2	33.3333	33.3333	33.3333		509	972	463
D6	Gr2	66.6667	33.3333	0		521	1022	501
D6	Gr2	50	50	0		526	1039	513
D6	Gr2	66.6667	16.6667	16.6667		531	1041	510
D7	Gr2	50	33.3333	16.6667		482	1151	669
D7	Gr2	33.3333	50	16.6667		492	1170	678
D7	Gr2	33.3333	50	16.6667		493	1171	678
D8	Gr2	50	33.3333	16.6667		502	1446	944
D8	Gr2	66.6667	16.6667	16.6667		511	1458	947
D8	Gr2	33.3333	50	16.6667		514	1464	950
D9	Gr2	33.3333	50	16.6667		482	1727	1245
D9	Gr2	16.6667	66.6667	16.6667		495	1740	1245
D9	Gr2	33.3333	66.6667	0		496	1747	1251
D10	Gr2	50	33.3333	16.6667		531	2045	1514
D10	Gr2	66.6667	33.3333	0		533	2060	1527
D10	Gr2	50	16.6667	33.3333		538	2066	1528
D11	Gr2	50	50	0		518	2332	1814
D11	Gr2	66.6667	33.3333	0		521	2347	1826
D11	Gr2	50	33.3333	16.6667		524	2350	1826

## Sheet: ControlSheet
	mCode	sep	yLow	yUp			Ribbon pointer
	2	1	0	9999			0
