# Supplementary material for: Plant-associated CO2 mediates long-distance host location and foraging behaviour of a root herbivore
Source: eLife. 2021 Apr 20;10:e65575. doi: 10.7554/eLife.65575 (PMC8057813; doi:10.7554/eLife.65575)
Supplement: Figure 5—source data 1. [file elife-65575-fig5-data1.xlsx]

## Sheet: ControlSheet
	mCode	sep	yLow	yUp			Ribbon pointer
	2	1	0	9999			0

## Sheet: Fig. 5C
Silencing construct fed to larvae	Crawled distance (cm)	Time spent on CO2 source(s)	Mean speed (cm/s)
GFP	5.15605	155	0.206242
GFP	5.75489	165	0.383659
GFP	7.87836	145	0.225096
GFP	6.88742	115	0.10596
GFP	9.80486	130	0.196097
GFP	4.74125	135	0.105361
Gr2	20.9994	0	0.279992
Gr2	20.1394	2	0.111885
Gr2	19.1023	3	0.254698
Gr2	19.2279	5	0.213644
Gr2	14.9329	0	0.0829604
Gr2	21.9359	4	0.121866

## Sheet: Fig. 5F
Silencing construct fed to larvae	Crawled distance (cm)	Time spent to reach roots (s)	Mean speed (cm/s)
GFP	15.334	140	0.109528
GFP	13.5023	165	0.0818319
GFP	18.8446	200	0.0942231
GFP	14.3626	190	0.0755924
GFP	14.5796	170	0.0857622
GFP	16.5885	170	0.0975795
Gr2	13.1121	170	0.0771302
Gr2	13.8451	190	0.072869
Gr2	15.1007	160	0.0943797
Gr2	12.2465	120	0.102054
Gr2	21.4174	190	0.112723
Gr2	17.9532	170	0.105607
