# Supplementary material for: Plant-associated CO2 mediates long-distance host location and foraging behaviour of a root herbivore
Source: eLife. 2021 Apr 20;10:e65575. doi: 10.7554/eLife.65575 (PMC8057813; doi:10.7554/eLife.65575)
Supplement: Figure 6—source data 1. [file elife-65575-fig6-data1.xlsx]

## Sheet: Fig. 6AB, Fig 6-fig suppl 1
			Larval choice (%)				CO2 detected in each olfactometer side (ppm)
Olfactometer arm size	Presence of CO2 scrubber	Silencing construct fed to larvae	No plant side	Plant side	No choice		No plant side	Plant side
Short	Absent	GFP	16.6667	66.6667	16.6667		504	614
Short	Absent	GFP	16.6667	50	33.3333		506	610
Short	Absent	GFP	33.3333	50	16.6667		508	600
Short	Absent	GFP	0	83.3333	16.6667		504	598
Short	Present	GFP	0	66.6667	33.3333		397	398
Short	Present	GFP	33.3333	50	16.6667		387	394
Short	Present	GFP	16.6667	66.6667	16.6667		384	392
Short	Present	GFP	16.6667	50	33.3333		392	380
Long	Absent	GFP	16.6667	66.6667	16.6667		509	615
Long	Absent	GFP	33.3333	66.6667	0		507	625
Long	Absent	GFP	33.3333	66.6667	0		502	645
Long	Absent	GFP	16.6667	83.3333	0		500	611
Long	Present	GFP	66.6667	33.3333	0		387	396
Long	Present	GFP	50	50	0		384	390
Long	Present	GFP	66.6667	16.6667	16.6667		389	384
Long	Present	GFP	50	50	0		376	374
Short	Absent	Gr2	33.3333	50	16.6667		502	615
Short	Absent	Gr2	33.3333	50	16.6667		503	600
Short	Absent	Gr2	16.6667	66.6667	16.6667		510	625
Short	Absent	Gr2	0	83.3333	16.6667		508	623
Short	Present	Gr2	33.3333	66.6667	0		384	392
Short	Present	Gr2	33.3333	66.6667	0		382	380
Short	Present	Gr2	16.6667	50	33.3333		387	384
Short	Present	Gr2	0	66.6667	33.3333		362	345
Long	Absent	Gr2	50	50	0		507	625
Long	Absent	Gr2	33.3333	50	16.6667		504	605
Long	Absent	Gr2	50	33.3333	16.6667		506	609
Long	Absent	Gr2	66.6667	33.3333	0		500	601
Long	Present	Gr2	50	33.3333	16.6667		376	377
Long	Present	Gr2	33.3333	50	16.6667		377	366
Long	Present	Gr2	50	50	0		374	367
Long	Present	Gr2	50	50	0		385	400

## Sheet: Fig 6-fig suppl 2
	Volatile emission (ng/h)
Presence of soda lime (CO2 scrubber) plug	Cycloisosativene (1)	Alpha-copaene (2)	Beta-caryophyllene (3)	Humulene (4)	Gamma-muurolene (5)	Alfa-Muurolene (6)	Tetradecanal (7)
Absent (control)	0	14.0445	16.1657	0	16.1767	0	13.8003
Absent (control)	10.4757	40.6293	99.9022	5.76564	70.428	7.66139	108.95
Absent (control)	8.22114	36.7301	46.5824	3.85132	50.7861	5.30309	43.0757
Absent (control)	23.0349	94.7434	212.677	36.2661	134.697	16.7814	92.4198
Absent (control)	23.2776	89.5929	171.267	11.5563	151.938	19.9018	7.3509
Present (Soda lime)	7.92129	42.5485	65.1154	4.46214	67.1917	9.50797	3.46432
Present (Soda lime)	10.7488	50.5139	111.597	9.17711	88.0389	14.5447	16.5069
Present (Soda lime)	9.16106	44.7371	119.088	7.22522	58.4402	10.3299	76.0078
Present (Soda lime)	7.16554	36.6888	77.2041	4.22692	40.9953	6.46585	6.10022
Present (Soda lime)	19.8117	103.535	257.545	19.1064	171.539	17.8262	78.0336

## Sheet: ControlSheet
	mCode	sep	yLow	yUp			Ribbon pointer
	2	1	0	9999			0
