# Supplementary material for: Plant-associated CO2 mediates long-distance host location and foraging behaviour of a root herbivore
Source: eLife. 2021 Apr 20;10:e65575. doi: 10.7554/eLife.65575 (PMC8057813; doi:10.7554/eLife.65575)
Supplement: Figure 7—source data 1. [file elife-65575-fig7-data1.xlsx]

## Sheet: Fig. 7A
		Proportion of larvae found in each tray zone (%)
Tray	Silencing contruct fed to larvae	Zone 5	Zone 4	Zone 3	Zone 2	Zone 1
1	GFP	14.2857	23.8095	19.0476	14.2857	28.5714
2	GFP	22.2222	22.2222	22.2222	16.6667	16.6667
3	GFP	22.2222	16.6667	16.6667	27.7778	16.6667
4	Gr2	19.0476	28.5714	14.2857	23.8095	14.2857
5	Gr2	22.2222	11.1111	27.7778	11.1111	27.7778
6	Gr2	17.6471	23.5294	17.6471	17.6471	23.5294

## Sheet: Fig. 7B, Fig. 7-fig suppl 1
Tray zone where air was sampled	CO2 (ppm)
Zone1	442.869
Zone2	530.796
Zone3	544.456
Zone4	450.932
Zone5	414.099
Zone6	427.18
Zone7	407.44
Zone8	394.58
Zone9	401.362
Zone10	406.732
Zone11	396.713
Zone12	388.484
Zone13	392.247
Zone14	410.881
Zone15	383.406
Zone16	401.775
Zone17	418.119
Zone18	414.516
Zone19	382.351
Zone20	403.956
Zone21	390.719
Zone22	408.976
Zone23	400.264
Zone24	402.995

## Sheet: Fig. 7C
		Proportion of larvae found in each tray zone (%)
Tray	Silencing contruct fed to larvae	Zone 5	Zone 4	Zone 3	Zone 2	Zone 1
1	GFP	4.16667	0	8.33333	20.8333	66.6667
2	GFP	4.16667	8.33333	12.5	20.8333	54.1667
3	GFP	0	16.6667	4.16667	20.8333	58.3333
4	GFP	4.34783	4.34783	17.3913	30.4348	43.4783
5	GFP	0	7.69231	19.2308	34.6154	38.4615
6	GFP	4	16	4	16	60
7	Gr2	4	12	36	20	28
8	Gr2	11.5385	19.2308	15.3846	11.5385	42.3077
9	Gr2	0	28	0	36	36
10	Gr2	4	12	24	36	24
11	Gr2	4	16	16	36	28
12	Gr2	0	20	36	4	40

## Sheet: Fig. 7D
		Proportion of larvae found in each tray zone (%)
Tray	Silencing contruct fed to larvae	Zone 5	Zone 4	Zone 3	Zone 2	Zone 1
1	GFP	0	4	12	24	60
2	GFP	0	8	8	28	56
3	GFP	4	12	16	12	56
4	GFP	0	8.33333	20.8333	25	45.8333
5	GFP	0	4.16667	4.16667	33.3333	58.3333
6	GFP	4.34783	17.3913	8.69565	21.7391	47.8261
7	Gr2	4.16667	12.5	12.5	20.8333	50
8	Gr2	8.33333	16.6667	8.33333	16.6667	50
9	Gr2	4	20	20	20	36
10	Gr2	8.33333	16.6667	25	29.1667	20.8333
11	Gr2	4	12	16	32	36
12	Gr2	0	20.8333	37.5	12.5	29.1667

## Sheet: Fig. 7E
		Proportion of larvae found in each tray zone (%)
Tray	Silencing contruct fed to larvae	Zone 5	Zone 4	Zone 3	Zone 2	Zone 1
1	GFP	4	8	8	16	64
2	GFP	4	12	12	16	56
3	GFP	15.3846	7.69231	15.3846	7.69231	53.8462
4	GFP	11.5385	15.3846	19.2308	0	53.8462
5	GFP	7.69231	7.69231	11.5385	3.84615	69.2308
6	GFP	11.5385	11.5385	3.84615	0	73.0769
7	Gr2	4	8	16	32	40
8	Gr2	8.33333	20.8333	20.8333	12.5	37.5
9	Gr2	4.16667	12.5	16.6667	29.1667	37.5
10	Gr2	8.33333	16.6667	33.3333	4.16667	37.5
11	Gr2	8.69565	21.7391	8.69565	13.0435	47.8261
12	Gr2	4.34783	8.69565	8.69565	30.4348	47.8261

## Sheet: Fig. 7F
		Proportion of larvae found in each tray zone (%)
Tray	Silencing contruct fed to larvae	Zone 5	Zone 4	Zone 3	Zone 2	Zone 1
1	GFP	4	0	0	24	72
2	GFP	4	0	0	16	80
3	GFP	4	0	4	24	68
4	GFP	0	4	8	12	76
5	GFP	0	7.69231	11.5385	3.84615	76.9231
6	GFP	0	8	4	4	84
7	Gr2	4.54545	9.09091	9.09091	9.09091	68.1818
8	Gr2	4	4	8	20	64
9	Gr2	8.69565	8.69565	4.34783	4.34783	73.913
10	Gr2	4.54545	9.09091	9.09091	9.09091	68.1818
11	Gr2	4.34783	13.0435	4.34783	30.4348	47.8261
12	Gr2	17.3913	4.34783	13.0435	17.3913	47.8261

## Sheet: Fig. 7-fig suppl. 2
Tray	Silencing construct fed to larvae	Time after releasing the larvae (h)	Number of larvae found close to roots	Proportion of larvae found close to roots (%)	Cumulative proportion of larvae found close to the roots (%)
1	GFP	4	2	8	8
2	GFP	4	2	8	8
3	GFP	4	3	12	12
4	GFP	4	1	4	4
5	GFP	4	0	0	0
6	Gr2	4	0	0	0
7	Gr2	4	1	4	4
8	Gr2	4	1	4	4
9	Gr2	4	0	0	0
10	Gr2	4	1	4	4
1	GFP	7	1	4	12
2	GFP	7	0	0	8
3	GFP	7	2	8	20
4	GFP	7	3	12	16
5	GFP	7	1	4	4
6	Gr2	7	0	0	0
7	Gr2	7	2	8	12
8	Gr2	7	1	4	8
9	Gr2	7	0	0	0
10	Gr2	7	1	4	8
1	GFP	10	7	28	40
2	GFP	10	6	24	32
3	GFP	10	6	24	44
4	GFP	10	5	20	36
5	GFP	10	7	28	32
6	Gr2	10	4	16	16
7	Gr2	10	3	12	24
8	Gr2	10	4	16	24
9	Gr2	10	5	20	20
10	Gr2	10	7	28	36
1	GFP	24	10	40	80
2	GFP	24	12	48	80
3	GFP	24	10	40	84
4	GFP	24	8	32	68
5	GFP	24	10	40	72
6	Gr2	24	7	28	44
7	Gr2	24	8	32	56
8	Gr2	24	9	36	60
9	Gr2	24	7	28	48
10	Gr2	24	6	24	60
1	GFP	30	4	16	96
2	GFP	30	4	16	96
3	GFP	30	3	12	96
4	GFP	30	4	16	84
5	GFP	30	2	8	80
6	Gr2	30	0	0	44
7	Gr2	30	2	8	64
8	Gr2	30	1	4	64
9	Gr2	30	0	0	48
10	Gr2	30	0	0	60
1	GFP	48	0	0	96
2	GFP	48	0	0	96
3	GFP	48	1	4	100
4	GFP	48	0	0	84
5	GFP	48	1	4	84
6	Gr2	48	4	16	60
7	Gr2	48	3	12	76
8	Gr2	48	1	4	68
9	Gr2	48	4	16	64
10	Gr2	48	2	8	68
1	GFP	54	0	0	96
2	GFP	54	0	0	96
3	GFP	54	0	0	100
4	GFP	54	0	0	84
5	GFP	54	0	0	84
6	Gr2	54	0	0	60
7	Gr2	54	0	0	76
8	Gr2	54	0	0	68
9	Gr2	54	0	0	64
10	Gr2	54	1	4	72
1	GFP	72	0	0	96
2	GFP	72	0	0	96
3	GFP	72	0	0	100
4	GFP	72	0	0	84
5	GFP	72	0	0	84
6	Gr2	72	0	0	60
7	Gr2	72	0	0	76
8	Gr2	72	0	0	68
9	Gr2	72	0	0	64
10	Gr2	72	0	0	72

## Sheet: ControlSheet
	mCode	sep	yLow	yUp			Ribbon pointer
	2	1	0	9999			0
