# Supplementary material for: Plant-associated CO2 mediates long-distance host location and foraging behaviour of a root herbivore
Source: eLife. 2021 Apr 20;10:e65575. doi: 10.7554/eLife.65575 (PMC8057813; doi:10.7554/eLife.65575)
Supplement: Figure 8—source data 1. [file elife-65575-fig8-data1.xlsx]

## Sheet: Fig. 8A, Fig. 8-fig. suppl. 1A 
	CO2 levels detected in each tray zone (ppm)
Tray	Zone 5	Zone 4	Zone 3	Zone 2	Zone 1
1	530.895	403.089	573.9	596.647	688.066
2	435.457	553.123	386.546	490.519	546.183
3	468.964	424.438	390.841	490.652	397.727
4	387.399	424.446	605.9	565.19	569
5	385.188	483.087	410.351	504.44	537.523
6	559.743	429.263	351.247	528.254	743.83
7	426.15	397.834	413.896	648.774	751.143
8	454.095	434.694	334.73	635.621	597.065
9	581.819	404.125	329.508	509.98	604.978
10	445.478	434.31	415.437	521.131	682.332

## Sheet: Fig. 8B, Fig. 8-fig. suppl. 1B
	CO2 levels detected in each tray zone (ppm)
Tray	Zone 5	Zone 4	Zone 3	Zone 2	Zone 1
1	524.3	386.196	323.914	406.446	604.883
2	465.546	560.058	381.993	414.97	538.471
3	587.324	423.528	518.749	571.675	692.927
4	495.878	419.214	389.403	399.697	749.181
5	532.977	405.881	384.876	685.24	538.254
6	539.941	428.305	400.375	571.418	559.115
7	421.255	540.712	404.649	417.647	470.079
8	549.586	416.105	553.284	431.931	594.464
9	553.291	421.582	414.095	650.765	754.561
10	451.809	402.07	406.153	554.78	647.447

## Sheet: Fig. 8C
		Proportion of larvae found in each tray zone (%)
Tray	Silencing construct fed to larvae	Zone 5	Zone 4	Zone 3	Zone 2	Zone 1
1	GFP	25	10	0	25	40
2	GFP	15	15	0	25	45
3	GFP	25	5	0	15	55
4	GFP	20	10	5	15	50
5	GFP	5	5	10	15	65
6	GFP	45	20	0	5	30
7	Gr2	25	5	20	20	30
8	Gr2	25	10	10	20	35
9	Gr2	20	15	15	20	30
10	Gr2	20	15	20	25	20
11	Gr2	15	25	20	15	25
12	Gr2	20	20	20	15	25

## Sheet: Fig. 8D
		Proportion of larvae found in each tray zone (%)
Tray	Silencing construct fed to larvae	Zone 5	Zone 4	Zone 3	Zone 2	Zone 1
1	GFP	20	10	5	20	45
2	GFP	30	20	5	20	25
3	GFP	25	10	10	10	45
4	GFP	30	5	0	10	55
5	GFP	15	15	5	15	50
6	GFP	30	10	5	20	35
7	Gr2	25	10	15	25	25
8	Gr2	25	5	20	25	25
9	Gr2	30	25	15	15	15
10	Gr2	30	15	20	5	30
11	Gr2	25	20	5	20	30
12	Gr2	20	20	5	10	45

## Sheet: Fig. 8E
Experimental Unit	Fertilizer regimen used to grow the plants fed to larvae	Average larval mass (mg)
1	Low	8.42
2	Low	11.5
3	Low	8.64
4	Low	10.2
5	Low	13.2667
6	Low	10
7	Low	11.56
8	Low	7.73333
9	Low	8.94
10	Low	9.84
11	Low	7.65
12	Low	10.12
13	Low	9.56
14	Low	11.7
15	Low	10.46
16	Low	10.42
17	Low	8.25
18	Low	14.15
19	Low	8.86667
20	Low	10.4167
21	Medium	7.9
22	Medium	13.62
23	Medium	12.7333
24	Medium	15.54
25	Medium	14.94
26	Medium	15.3
27	Medium	14.6
28	Medium	13.28
29	Medium	15.64
30	Medium	12.7
31	Medium	11.72
32	Medium	13.05
33	Medium	10.3333
34	Medium	15.3
35	Medium	13.7
36	Medium	18.2
37	Medium	12.4
38	Medium	13.15
39	Medium	17.8
40	Medium	13.825
41	Optimum	12.5167
42	Optimum	16.8
43	Optimum	17.94
44	Optimum	15.88
45	Optimum	12.025
46	Optimum	18.5
47	Optimum	12.3667
48	Optimum	11.94
49	Optimum	11.7833
50	Optimum	18.55
51	Optimum	16.625
52	Optimum	14.5333
53	Optimum	16.8571
54	Optimum	15.25
55	Optimum	17.94
56	Optimum	15.0429
57	Optimum	14.9
58	Optimum	13.1
59	Optimum	12.04
60	Optimum	12.2

## Sheet: ControlSheet
	mCode	sep	yLow	yUp			Ribbon pointer
	2	1	0	9999			0
