# Supplementary material for: Plant-associated CO2 mediates long-distance host location and foraging behaviour of a root herbivore
Source: eLife journal article supplement (doi:10.7554/elife.65575), 2021-04-19
Supplement: figures [file elife-65575-figures-v1.pdf]

---

## Figures and figure supplements

Plant-associated CO<sub>2</sub> mediates long-distance host location and foraging behaviour of a root herbivore

**Carla CM Arce et al**

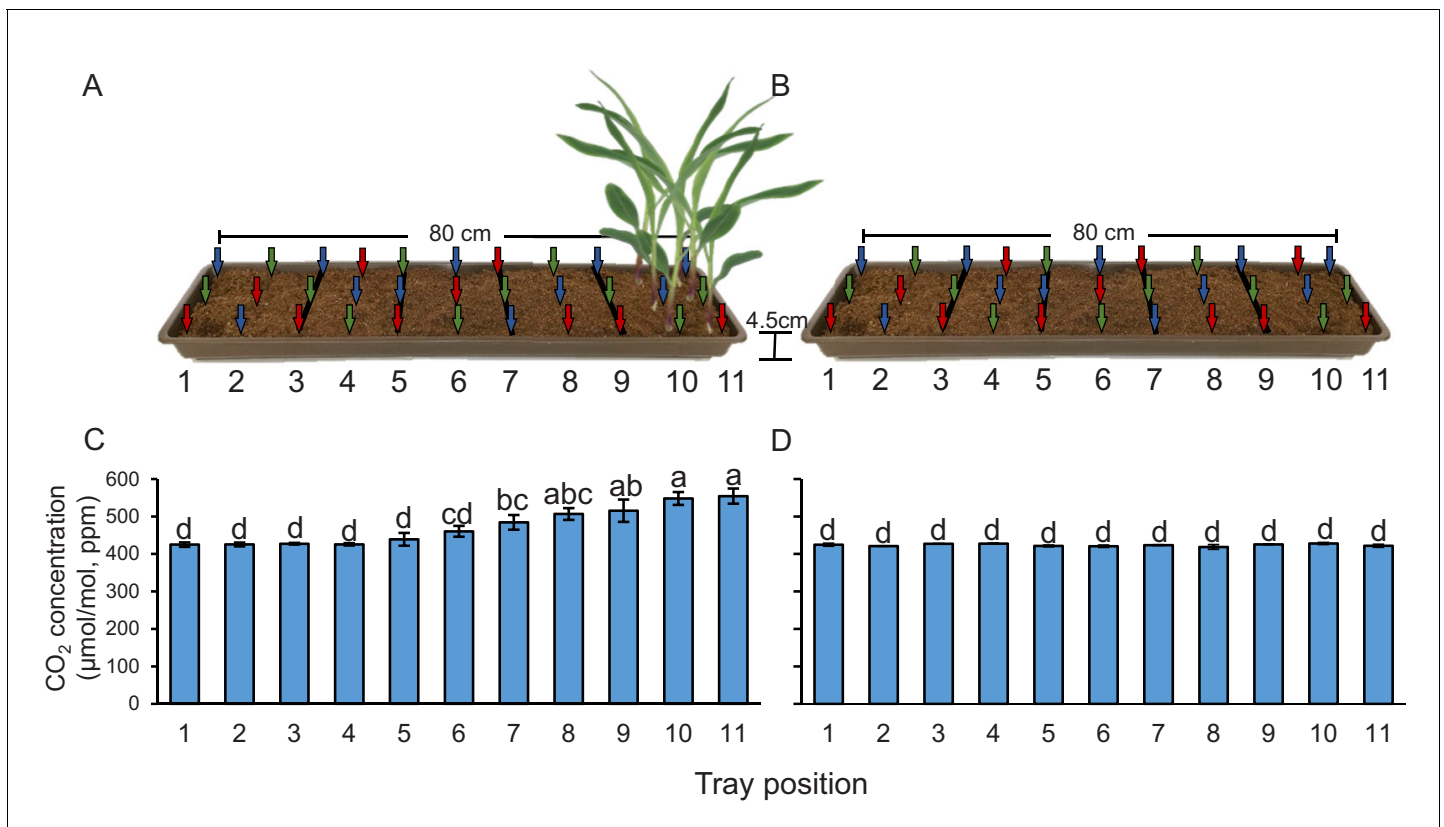

**Figure 1.** Plants create CO<sub>2</sub> gradients in the soil. (A, B) CO<sub>2</sub> levels were determined in soil-filled trays at different distances from young maize seedlings (A) before and (B) after removing the seedlings from the system. Arrows indicate air sampling points. Different colours indicate sampling positions within three individual trays that were assayed (n = 3). Red arrows indicate samplings points in tray 1, green arrows indicate samplings points in tray 2, and blue arrows indicate samplings points in tray 3. (C, D) Mean (± SEM) CO<sub>2</sub> levels at different distances from the plant (C) before and (D) after removing the seedlings from the system. Different letters indicate significant differences in CO<sub>2</sub> levels in each tray position (p < 0.05 by two-way ANOVA with Holm's multiple-comparisons test). For details regarding the statistical results, refer to **Supplementary file 1**. Raw data are available in **Figure 1—source data 1**.

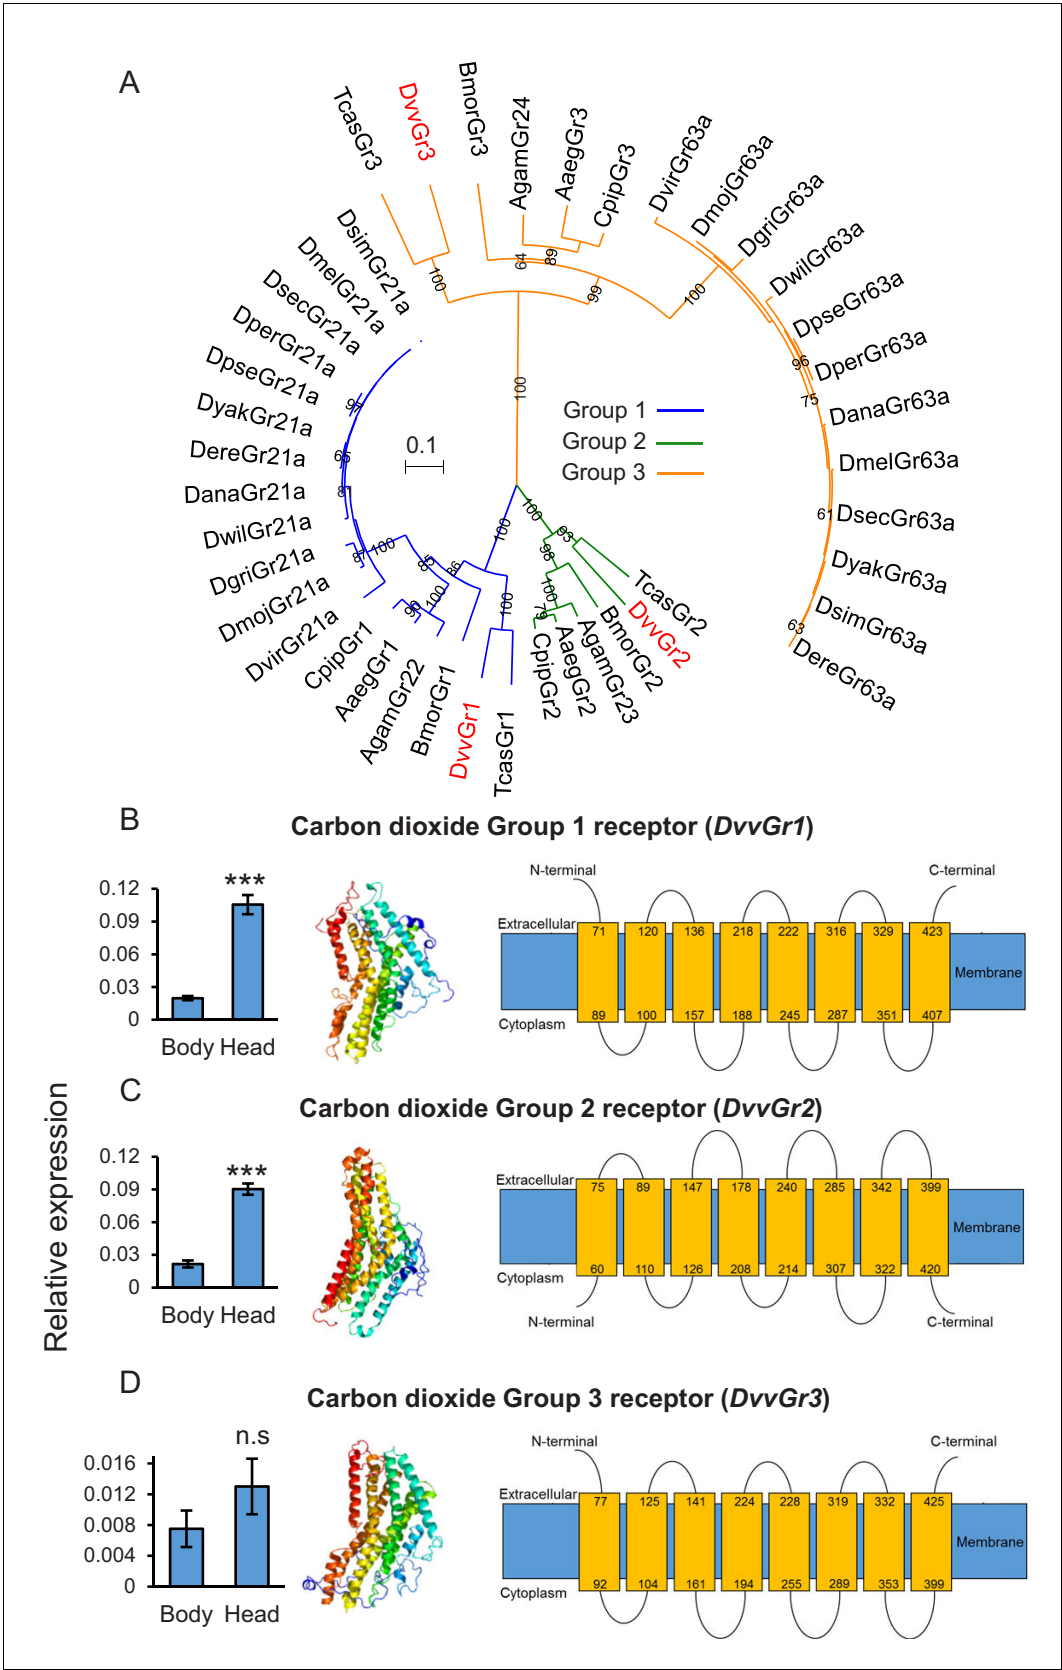

**Figure 2.** The western corn rootworm (WCR) genome contains three putative carbon dioxide (CO<sub>2</sub>) receptors. (A) Phylogenetic relationships between putative CO<sub>2</sub> receptors based on protein sequences of different insects. Dmel: *Drosophila melanogaster*. Figure 2 continued on next page

## Figure 2 continued

*Drosophila melanogaster*; Dsim: *Drosophila simulans*; Dsec: *Drosophila sechellia*; Dyak: *Drosophila yakuba*; Dere: *Drosophila erecta*; Dana: *Drosophila ananassae*; Dper: *Drosophila persimilis*; Dpse: *Drosophila pseudoobscura*; Dwil: *Drosophila willistoni*; Dgri: *Drosophila grimshawi*; Dmoj: *Drosophila mojavensis*; Dvir: *Drosophila virilis*; Agam: *Aedes gambiae*; Aaeg: *Aedes aegypti*; Cqui: *Culex quinquefasciatus*; Bmor: *Bombyx mori*; Tcas: *Tribolium castaneum*; Dv: *Diabrotica virgifera virgifera* (WCR). Evolutionary relationships were inferred using the neighbor-joining method. The optimal tree with the sum of branch length = 4.44068889 is shown. The percentage of replicate trees in which the associated taxa clustered together in the bootstrap test (100 replicates) are shown next to the branches. The tree is drawn to scale, with branch lengths in the same units as those of the evolutionary distances used to infer the phylogenetic tree. The evolutionary distances were computed using the Poisson correction method and are in the units of the number of amino acid substitutions per site. A total of 242 amino acid positions were included in the final data set. (B–D) Mean ( $\pm$  SEM) relative gene expression levels of group 1 (DvGr1) (B), group 2 (DvGr2) (C), and group 3 (DvGr3) (D) CO<sub>2</sub> receptors in the bodies (thorax and abdomen) or heads of second instar WCR larvae (n = 10). Asterisks indicate statistically significant differences between tissue types within genes (\*\*p < 0.01 by Student's t test; n.s.: not significant). For details regarding the statistical results, refer to **Supplementary file 1**. Raw data are available in **Figure 2—source data 1**. (B–D) Predicted protein tertiary structure (left) and transmembrane protein topology (right) of (B) DvGr1; (C) DvGr2, and (D) DvGr3 according to the Phyre2 algorithm.

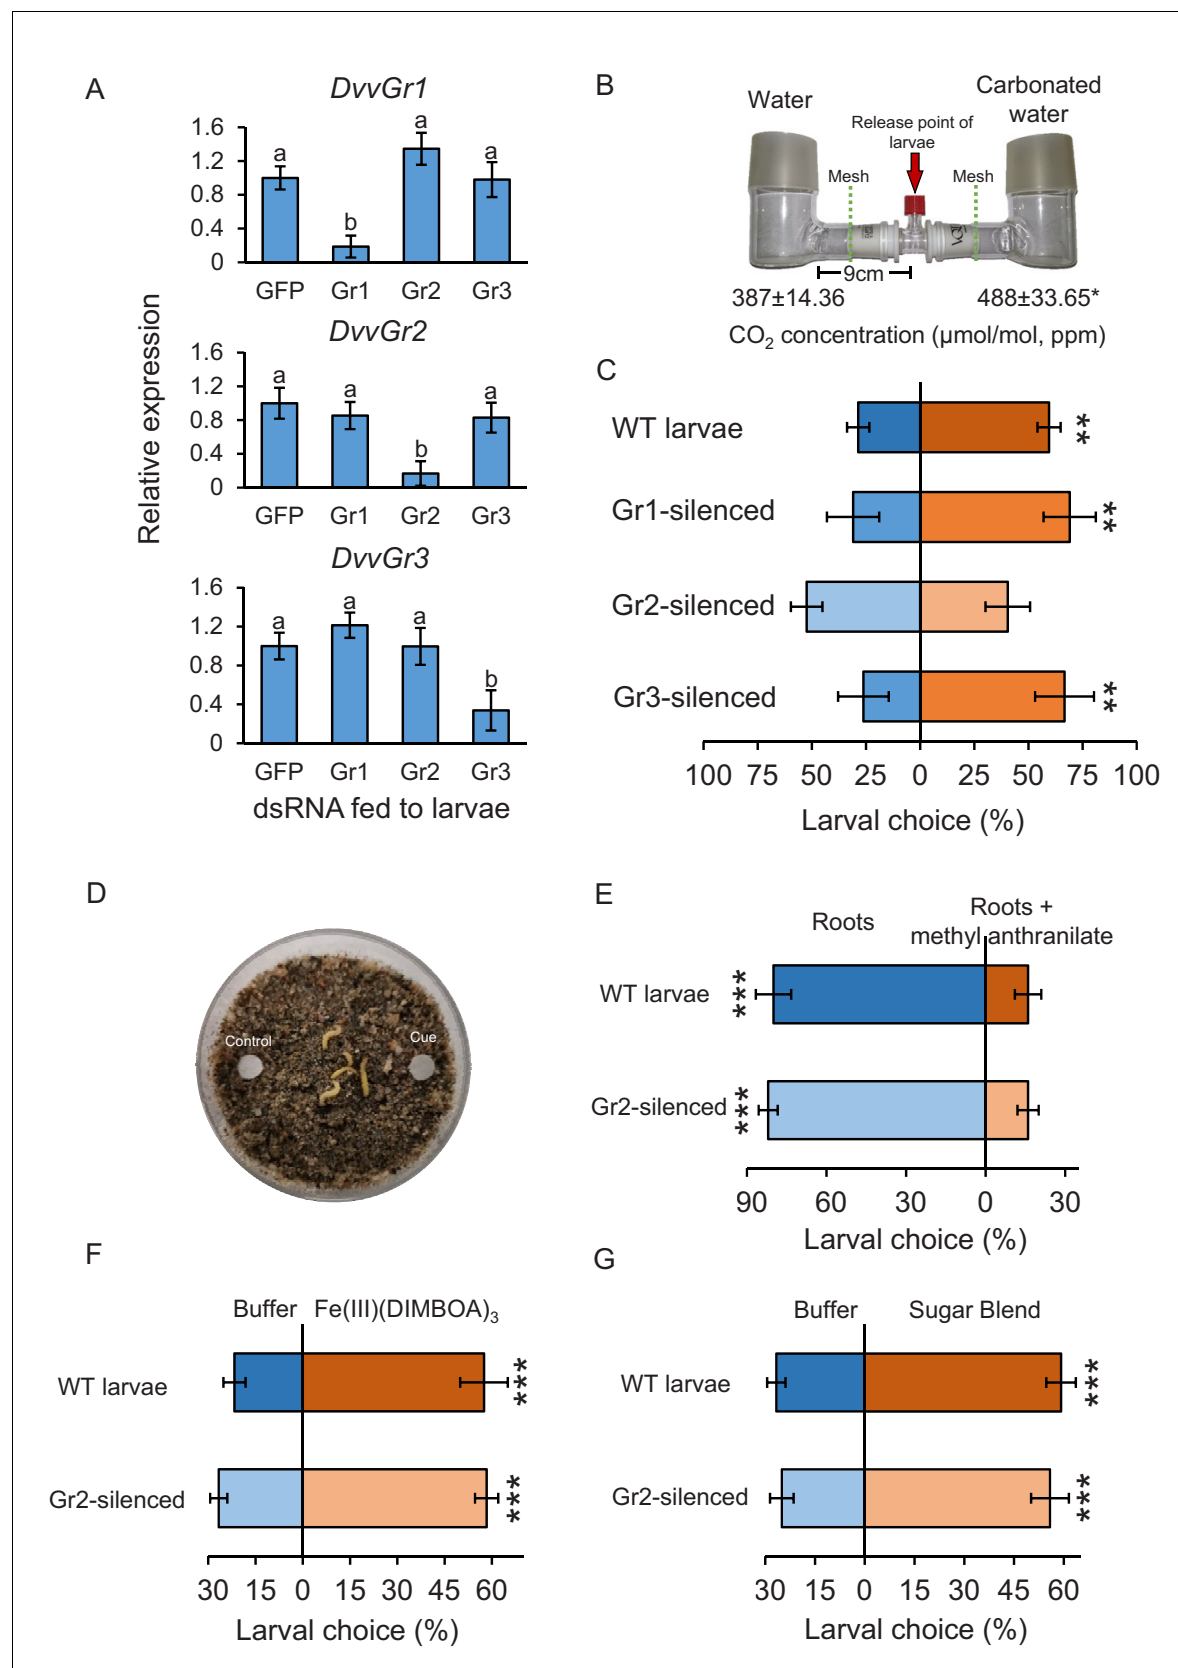

**Figure 3.** The carbon dioxide group 2 receptor (*DvGr2*) is specifically required for the attraction of western corn rootworm (WCR) towards CO<sub>2</sub>. (A) Mean (± SEM) relative gene expression levels of group 1 (*DvGr1*), group 2 (*DvGr2*), and group 3 (*DvGr3*) CO<sub>2</sub> receptors after WCR larvae were fed

Figure 3 continued on next page

## Figure 3 continued

with dsRNA-expressing bacteria targeting green fluorescent protein (GFP, herein referred to as WT), *DvGr1*, *DvGr2*, or *DvGr3* genes ( $n = 11\text{--}13$ ). Different letters indicate significant differences of gene expression levels ( $p < 0.05$  by one-way ANOVA with Holm's multiple-comparisons test). (B) Mean ( $\pm$  SEM)  $\text{CO}_2$  levels in each L-shaped pot of the two-arm belowground olfactometers used to test the attractive and repellent effects of  $\text{CO}_2$  to WCR larvae ( $n = 4\text{--}8$ ). Asterisk indicates significant differences in  $\text{CO}_2$  levels ( $*p < 0.05$  by Student's  $t$  test). For detailed data on  $\text{CO}_2$  levels, refer to **Figure 3—figure supplement 1**. (C) Mean ( $\pm$  SEM) proportion of WCR larvae observed in the olfactometer arms with higher  $\text{CO}_2$  levels (carbonated water side) or in control arms (distilled water side). Larvae were considered to have made a choice when they were found at a distance of 1 cm or less from the wire mesh (indicated by dashed green lines). Seven olfactometers with six larvae each were assayed ( $n = 7$ ). (D) Petri plates used to test insect responses to methyl anthranilate, to  $\text{Fe(III)(DIMBOA)}_3$ , and to sugars. (E) Mean ( $\pm$  SEM) proportion of WCR larvae observed on roots or on roots placed next to filter paper discs impregnated with methyl anthranilate, (F) on filter paper discs impregnated with buffer or with  $\text{Fe(III)(DIMBOA)}_3$ , and (G) on filter paper discs impregnated with buffer or with a blend of glucose, fructose, and sucrose. For (E), 10 choice arenas with five larvae each were assayed ( $n = 10$ ). Larvae were considered to have made a choice when they made physical contact with the roots or the filter paper discs. For (F, G), 20 choice arenas with six larvae each were assayed ( $n = 20$ ). Asterisks indicate statistically significant differences in larval choices between treatments ( $***p < 0.001$  by generalized linear model followed by False discovery rate (FDR)-corrected post hoc tests). Note that the number of replicates across experiments varied depending on the availability of insects. For details regarding the statistical results, refer to **Supplementary file 1**. Raw data are available in **Figure 3—source data 1**.

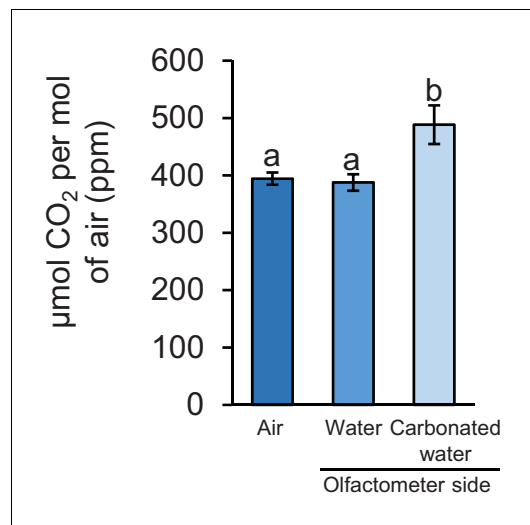

**Figure 3—figure supplement 1.** Carbon dioxide levels at different sampling points. Mean ( $\pm$  SEM) CO<sub>2</sub> levels in each olfactometer side and in the air ( $n = 3-4$ ). Different letters indicate significant differences in CO<sub>2</sub> levels ( $p < 0.05$  by one-way ANOVA with Holm's multiple-comparisons test).

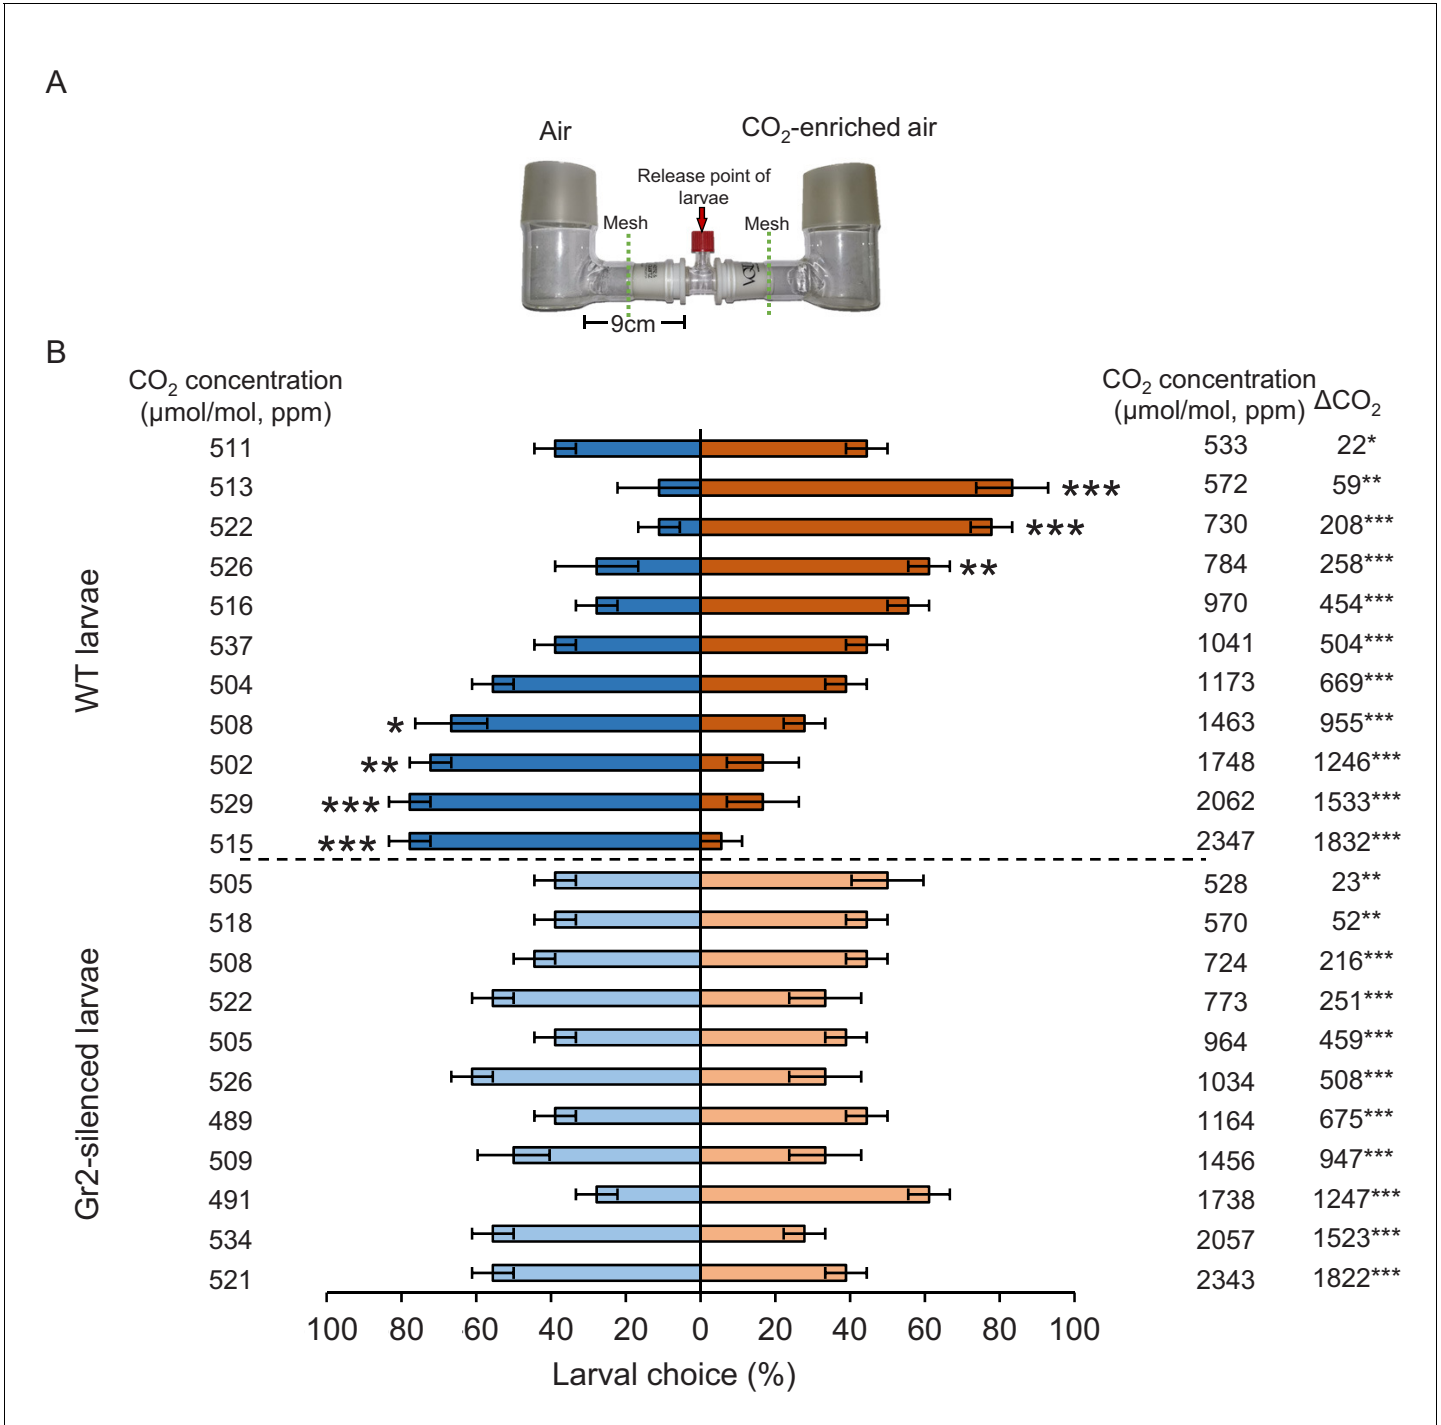

**Figure 4.** DvGr2 is required for dose-dependent western corn rootworm (WCR) responses to CO<sub>2</sub>. (A) Two-arm olfactometer used to test the attractive and repellent effects of CO<sub>2</sub> on WCR larvae. (B) Mean (± SEM) proportion of WCR larvae observed in each arm of the olfactometers. Larvae were considered to have made a choice when they were found at a distance of 1 cm or less from the wire mesh, indicated by dashed green lines. Three olfactometers with six larvae each were assayed (n = 3). Asterisks indicate statistically significant differences between larval choices (\*p < 0.05; \*\*p < 0.01; \*\*\*p < 0.001 by generalized linear model [GLM] followed by FDR-corrected post hoc tests). Mean CO<sub>2</sub> concentrations in each olfactometer side and the difference between them (ΔCO<sub>2</sub>) are indicated. Asterisks indicate significant differences in the CO<sub>2</sub> levels of each olfactometer arm (\*p < 0.05; \*\*p < 0.01; \*\*\*p < 0.001 by GLM followed by FDR-corrected post hoc tests). For detailed data on CO<sub>2</sub> levels, refer to **Figure 4—figure supplement 1**. For details regarding the statistical results, refer to **Supplementary file 1**. Raw data are available in **Figure 4—source data 1**.



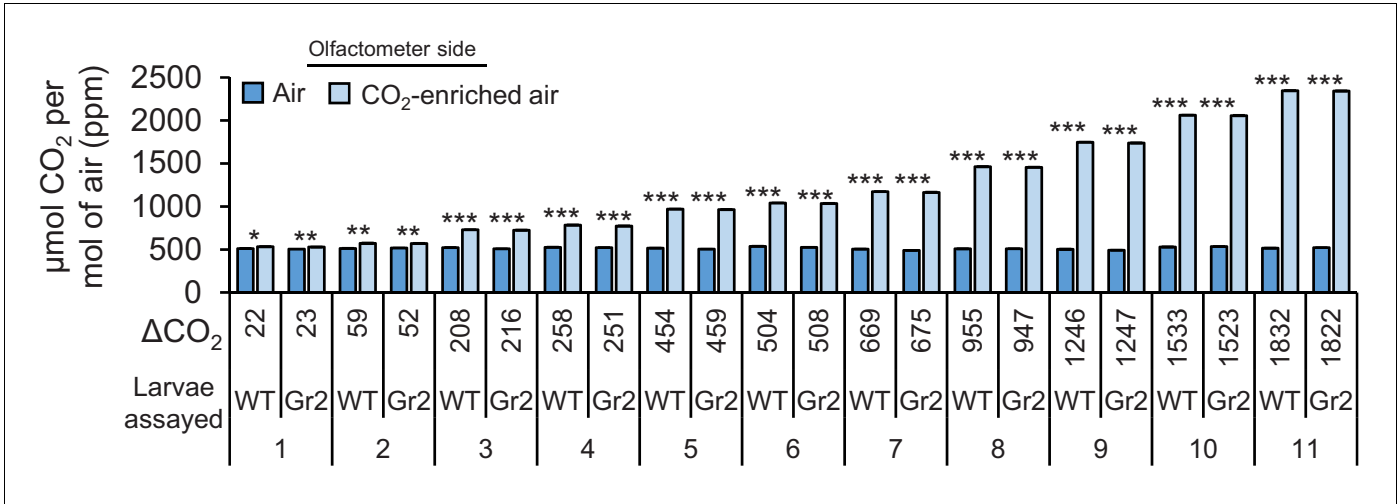

**Figure 4—figure supplement 1.** Carbon dioxide levels at different sampling points. Mean ( $\pm$  SEM) CO<sub>2</sub> levels in olfactometer sides that were treated with air or with CO<sub>2</sub>-enriched synthetic air ( $n = 3$ ). Asterisks indicate significant differences in CO<sub>2</sub> levels (\* $p < 0.05$ ; \*\* $p < 0.01$ ; \*\*\* $p < 0.001$  by generalized linear model (GLM) followed by FDR-corrected post hoc tests). For p-values of GLMs, refer to **Supplementary file 1**. Gr2: *DvGr2*-silenced larvae.

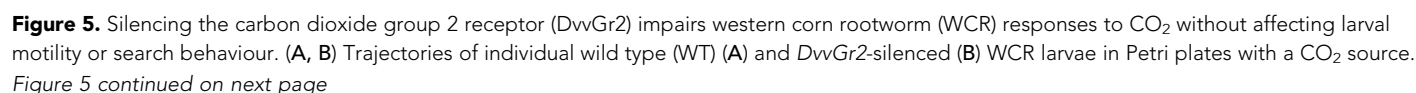

*Figure 5 continued*

The blue circles represent larval release points. The red circles represent CO<sub>2</sub> sources consisting of a fine needle that releases CO<sub>2</sub> at 581 ppm, resulting in CO<sub>2</sub> concentrations 60 ppm above ambient CO<sub>2</sub> levels at the release point. (C) Mean ( $\pm$  SEM) speed and distance covered during the movement phase, and time spent at the CO<sub>2</sub> source during the first 3 min of the experiment. (D, E) Trajectories followed by WT (D) and by *DvGr2*-silenced (E) WCR larvae on Petri plates containing maize seedling roots. The blue circles represent larval release points. The yellow circles represent maize seedling roots. (F) Mean ( $\pm$  SEM) speed and distance covered during the movement phase, and time necessary to reach the maize root during the first 3 min of the experiment. For both experiments, six Petri plates with one larva each were assayed ( $n = 6$ ). Asterisks indicate statistically significant differences between mobility parameters of WT and *DvGr2*-silenced larvae (\*\* $p < 0.001$  by Student's  $t$  test). For details regarding the statistical results, refer to **Supplementary file 1**. Raw data are available in **Figure 5—source data 1**.

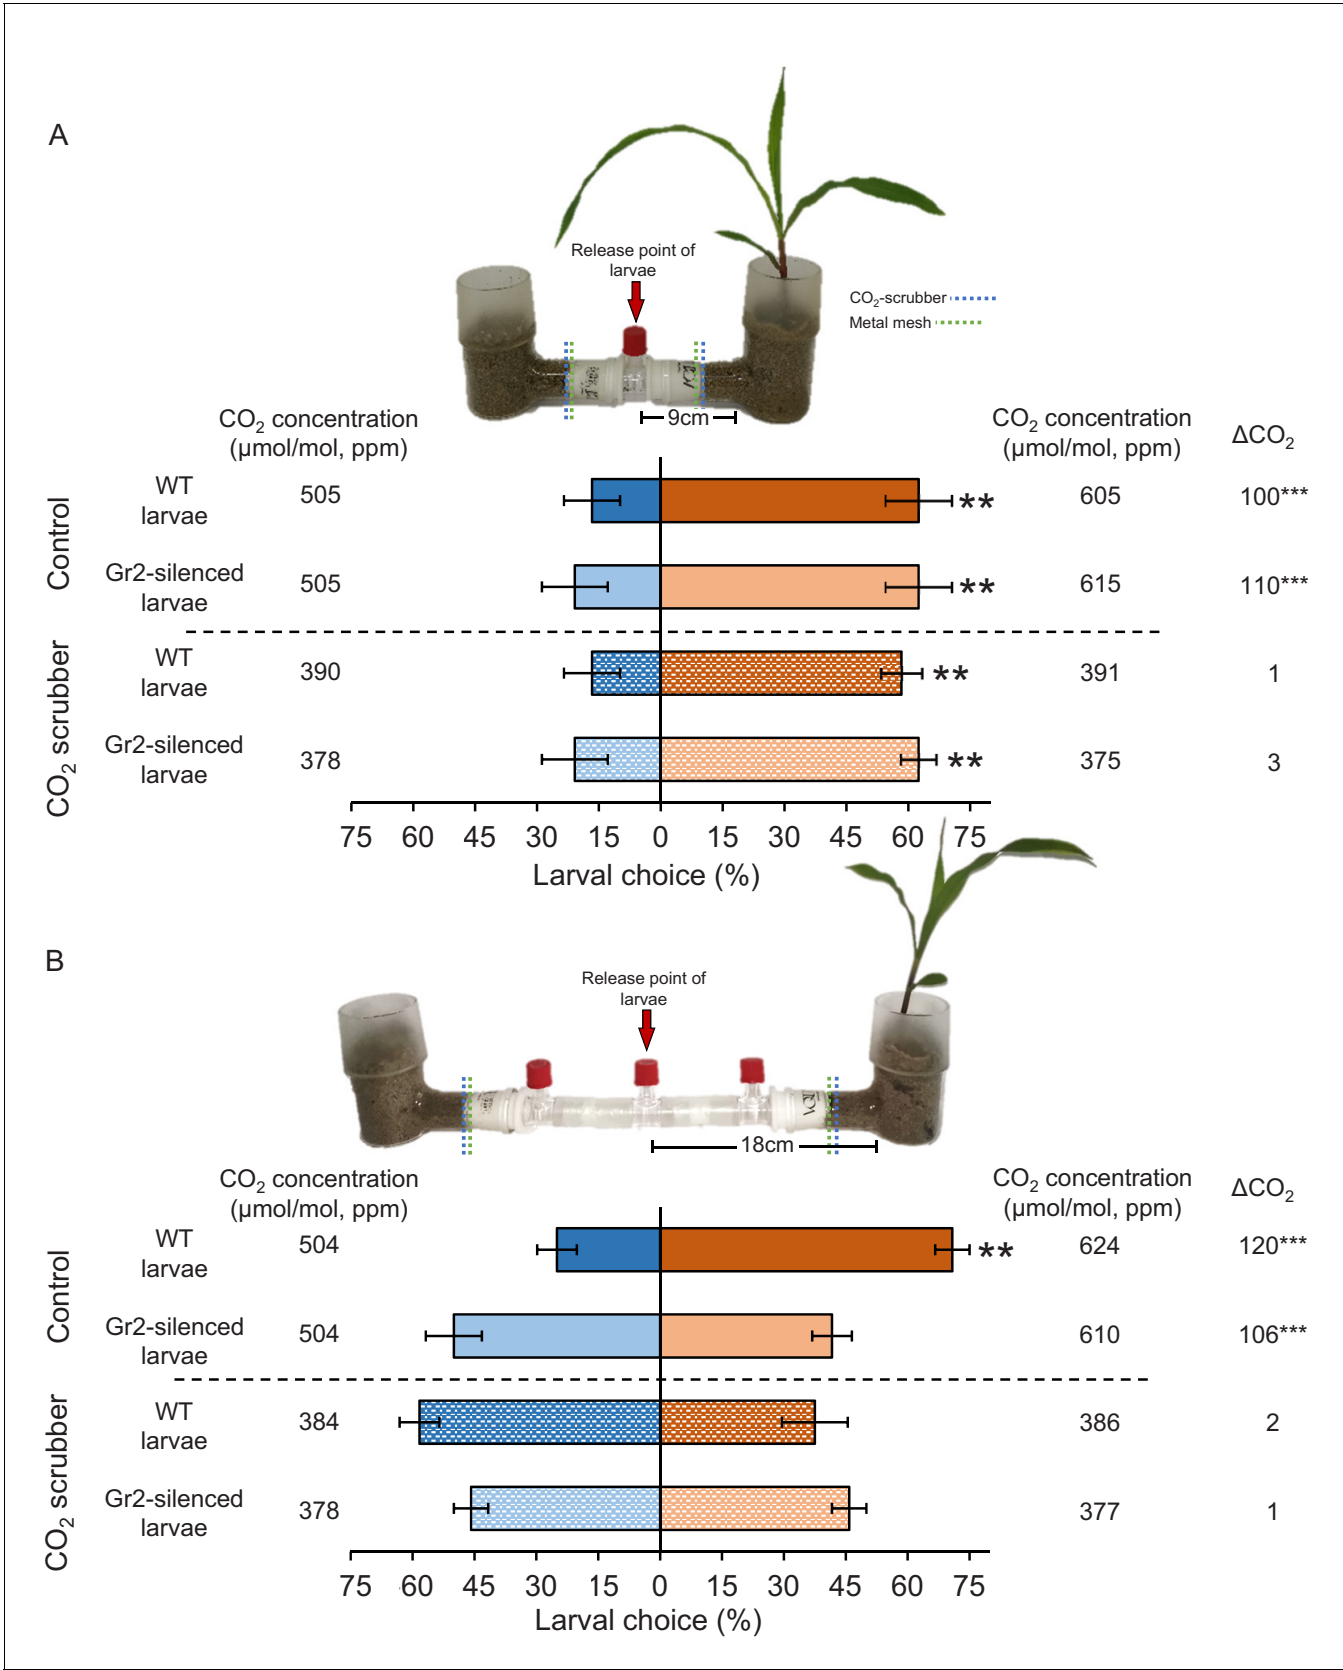

**Figure 6.** Plant-associated CO<sub>2</sub> mediates host location by western corn rootworm (WCR) larvae in a distance-specific manner. (A, B) Mean (± SEM) proportion (%) of WCR larvae observed on each side of the olfactometers. Larva were considered to have made a choice when they were found at a

Figure 6 continued on next page

*Figure 6 continued*

distance of 1 cm or less from the wire mesh, indicated by dashed green lines. Control olfactometers allowed for plant-associated CO<sub>2</sub> to diffuse into the central glass tubes, while CO<sub>2</sub> scrubber olfactometers were outfitted with soda lime to suppress CO<sub>2</sub> diffusion while allowing for the diffusion of other volatiles. Mean CO<sub>2</sub> concentrations in each olfactometer side and the difference between them ( $\Delta$ CO<sub>2</sub>) are given. Asterisks indicate significant differences in the CO<sub>2</sub> levels of each olfactometer arm (\*\*p < 0.01 by generalized linear model [GLM] followed by FDR-corrected post hoc tests). For detailed data on CO<sub>2</sub> levels and other volatiles, refer to **Figure 6—figure supplements 1** and **2**. Four olfactometers with six larvae each were assayed using wild type (WT) or *DvGr2*-silenced larvae (n = 4). Asterisks indicate statistically significant differences between treatments (\*\*p < 0.01 by GLM followed by FDR-corrected post hoc tests). For details regarding the statistical results, refer to **Supplementary file 1**. Raw data are available in **Figure 6—source data 1**.

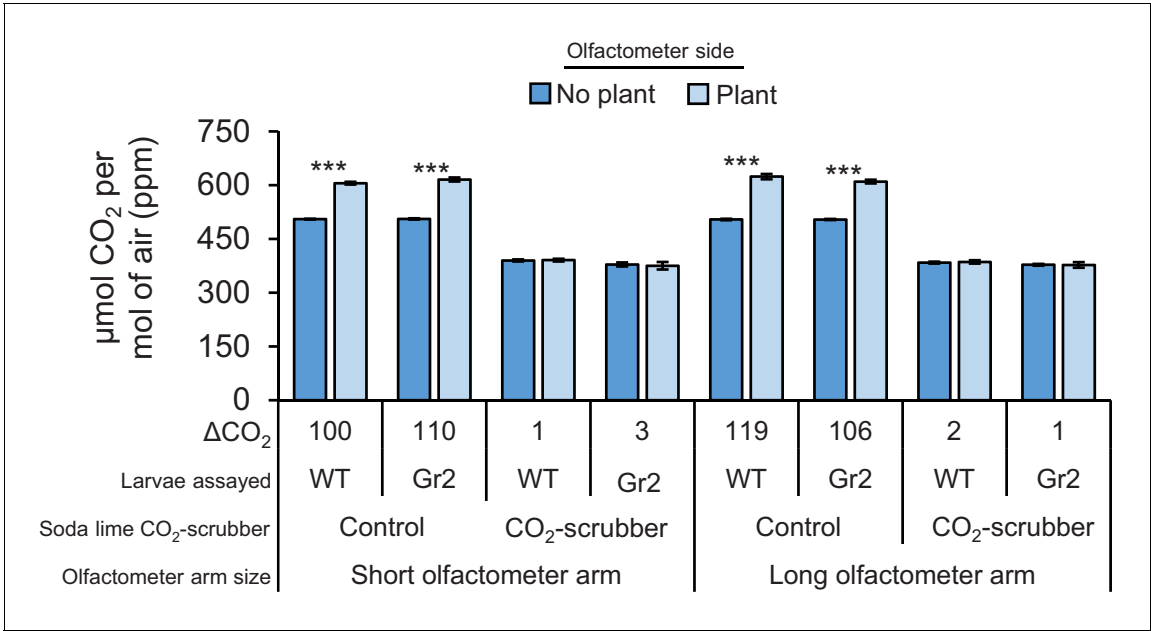

**Figure 6—figure supplement 1.** Carbon dioxide levels at different sampling points. Mean (± SEM) CO<sub>2</sub> levels in olfactometer sides with or without plants (n = 4). Asterisks indicate significant differences in CO<sub>2</sub> levels (\*\*\*p < 0.001 by generalized linear model [GLM] followed by FDR-corrected post hoc tests). For p-values of GLMs, refer to **Supplementary file 1**. Gr2: *DvGr2*-silenced larvae.

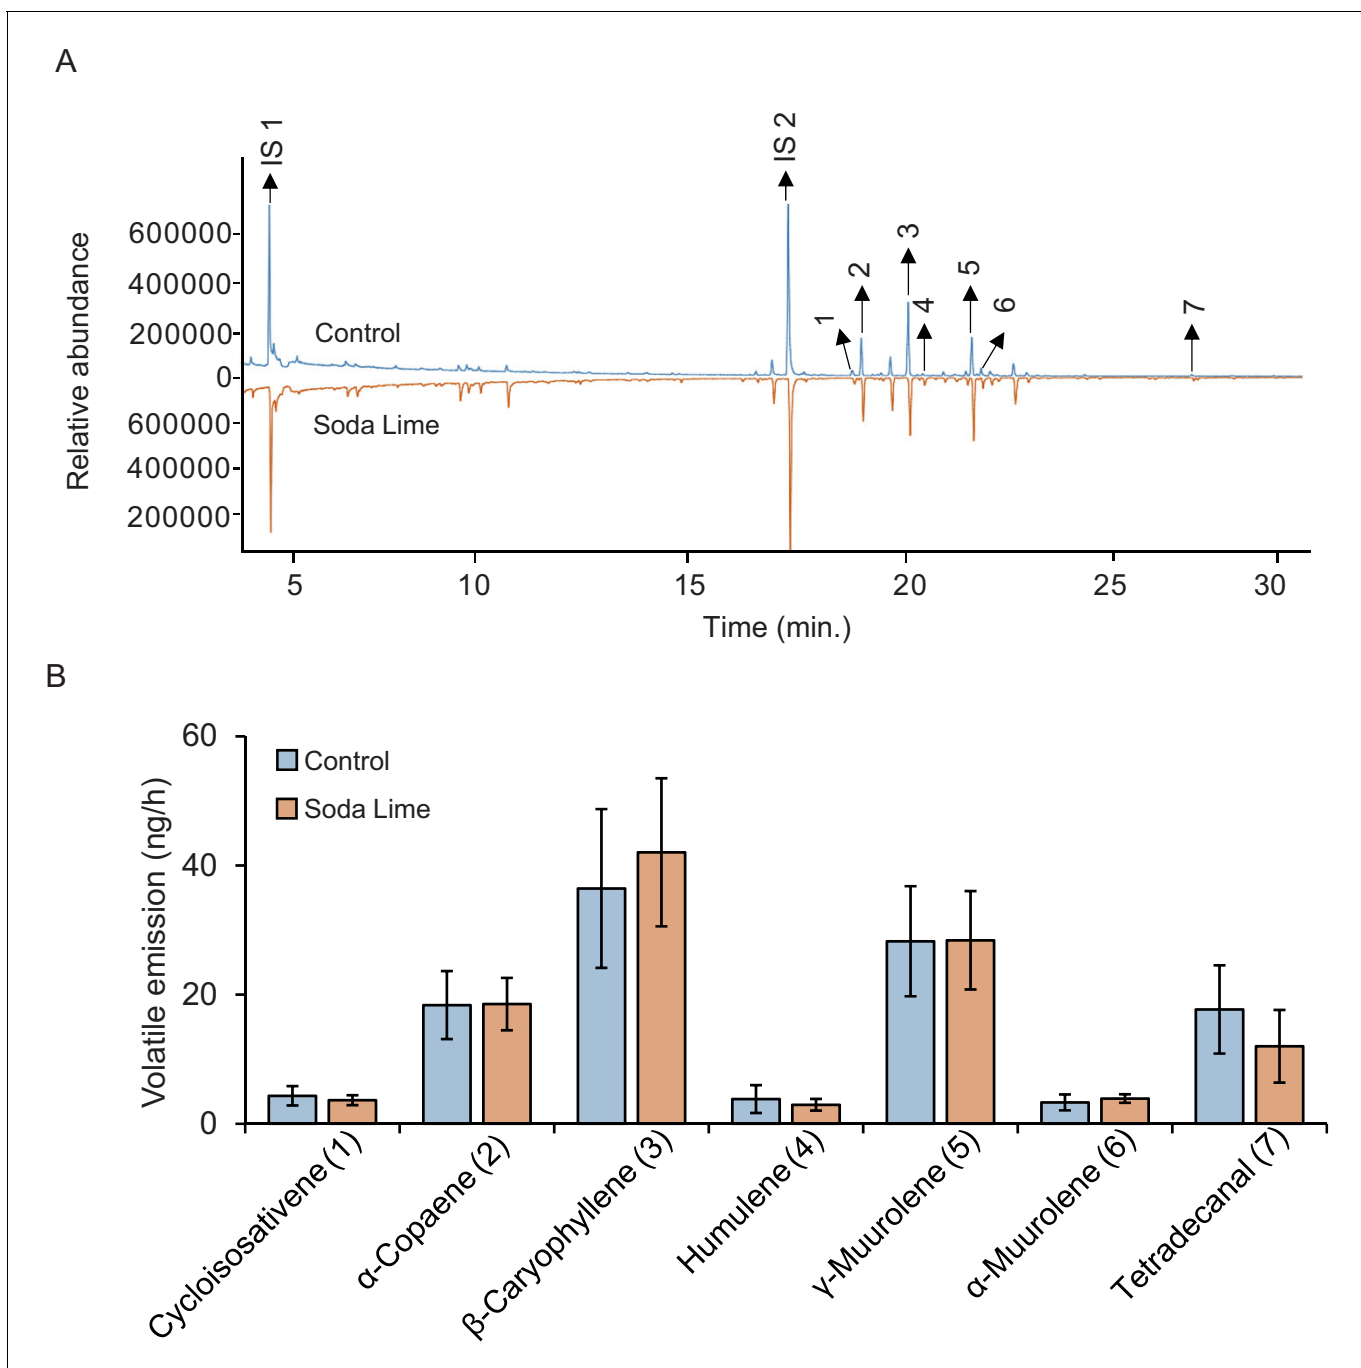

**Figure 6—figure supplement 2.** Soda lime does not influence the diffusion of plant volatiles other than CO<sub>2</sub> into olfactometer arms. (A) Representative chromatograms of volatiles from maize roots in the absence (control, blue chromatogram) or the presence of a soda lime layer that removes CO<sub>2</sub> (soda lime, orange chromatogram). (B) Mean ( $\pm$  SEM) levels of the most abundant plant volatiles are shown ( $n = 5$ ).

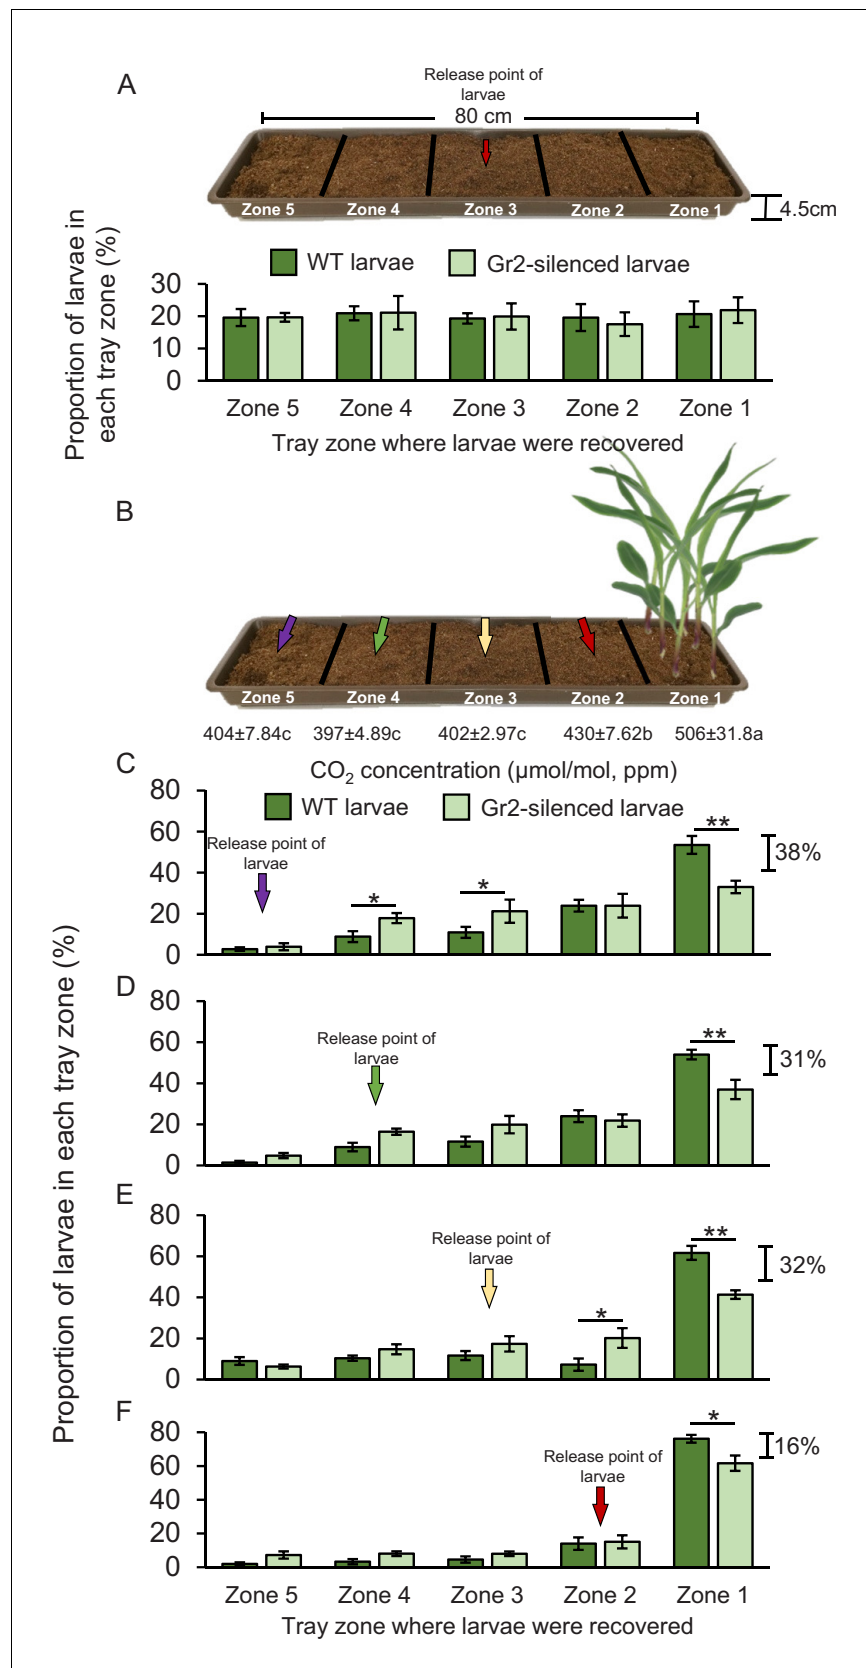

**Figure 7.** Root-associated CO<sub>2</sub> is used by western corn rootworm (WCR) larvae for host location in a distance-specific manner. (A) Mean (± SEM) proportion of wild type (WT) (dark green) or *DvGr2*-silenced (light green) WCR larvae in each tray zone. (B-F) Mean (± SEM) proportion of WT (dark green) or *DvGr2*-silenced (light green) WCR larvae in each tray zone for different CO<sub>2</sub> concentrations. (B) 404±7.84c, 397±4.89c, 402±2.97c, 430±7.62b, 506±31.8a. (C) 38%. (D) 31%. (E) 32%. (F) 16%. Significance markers (\*, \*\*) indicate statistical significance. Figure 7 continued on next page



*Figure 7 continued*

larvae observed in the different tray zones 8 hr after releasing the larvae in the centre of soil-filled trays without plants. Three trays per larval type with 20 larvae each were assayed ( $n = 3$ ). (B) Schematic representation (photomontage) of experimental set-up used to test distance-specific host location abilities of WCR larvae depicting mean ( $\pm$  SEM) CO<sub>2</sub> levels detected in the soil gas phase of each tray zone ( $n = 3$ –4). Different letters indicate significant differences in CO<sub>2</sub> levels ( $p < 0.05$  by one-way ANOVA with Holm's multiple-comparisons test). For detailed data on CO<sub>2</sub> levels, refer to **Figure 7—figure supplement 1**. (C–F) Mean ( $\pm$  SEM) proportion of WT (dark green) or *DvGr2*-silenced (light green) WCR larvae observed in the different tray zones 8 hr after releasing the larvae at distances of 64 cm (C), 48 cm (D), 32 cm (E), or 16 cm (F) from the plants. Six trays per larval type and distance combination with 20 larvae each were assayed ( $n = 6$ ). Asterisks indicate statistically significant differences in the proportion of WT and *DvGr2*-silenced larvae found in each tray zone (\* $p < 0.05$ ; \*\* $p < 0.01$  by generalized linear model followed by FDR-corrected post hoc tests). For details regarding the statistical results, refer to **Supplementary file 1**. Raw data are available in **Figure 7—source data 1**.

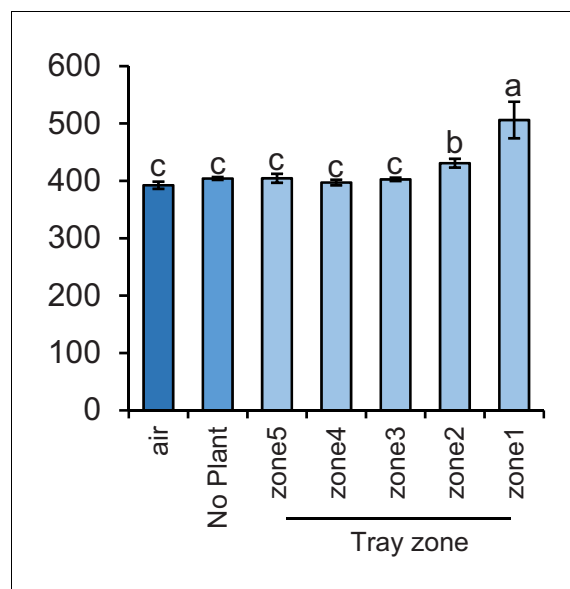

**Figure 7—figure supplement 1.** Carbon dioxide levels at different sampling points. Mean ( $\pm$  SEM) CO<sub>2</sub> levels detected in the soil gas phase of each tray zone or in the air ( $n = 3-4$ ). Different letters indicate significant differences in CO<sub>2</sub> levels ( $p < 0.05$  by one-way ANOVA with Holm's multiple-comparisons test).

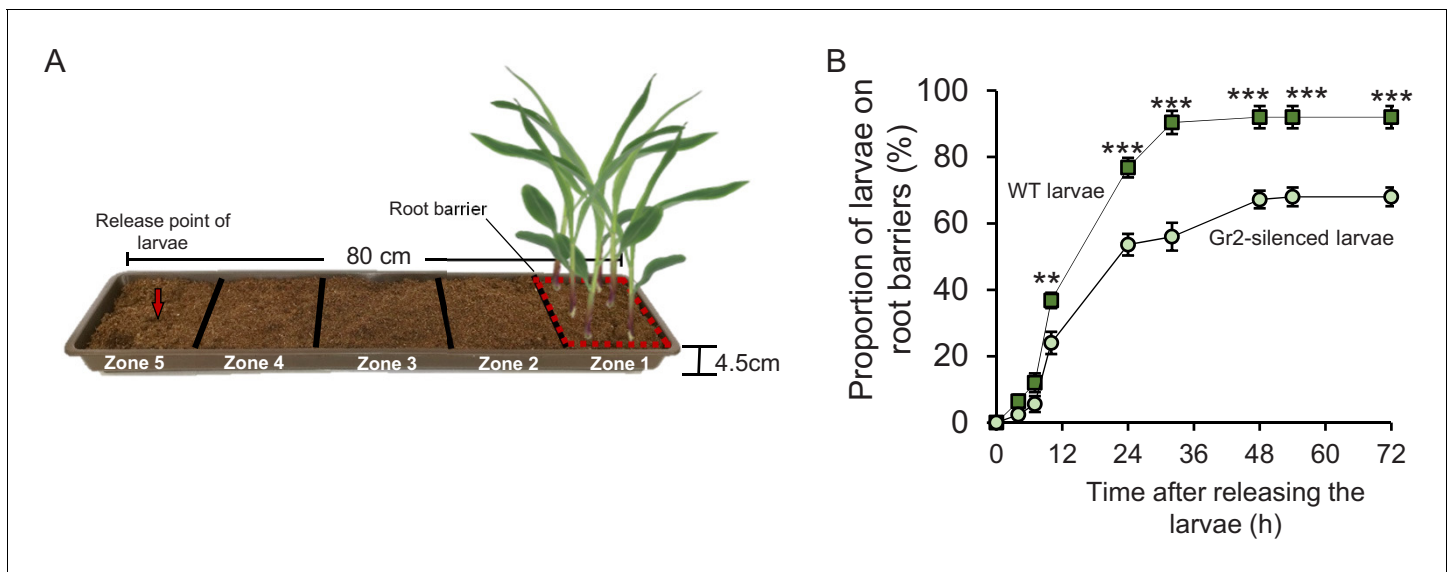

**Figure 7—figure supplement 2.** Root-associated CO<sub>2</sub> is required for host location by western corn rootworm (WCR) larvae at long distances. (A) Schematic representation (photomontage) of experimental set-up used. (B) Mean ( $\pm$  SEM) proportion of WCR larvae retrieved at close vicinity of root systems (i.e., on root barriers). Twenty-five larvae were released at 64 cm from the plants and five arenas were assayed ( $n = 5$ ). Soil surrounding root barriers (indicated by dashed red lines) were carefully inspected, and the observed larvae were collected and counted regularly. Asterisks indicate statistically significant differences in the proportion of larvae retrieved at each time point (\*\* $p < 0.01$ ; \*\*\* $p < 0.001$  by two-way repeated measures ANOVA with Holm's multiple-comparisons test). For p-values of the different factors and their interactions, refer to **Supplementary file 1**.

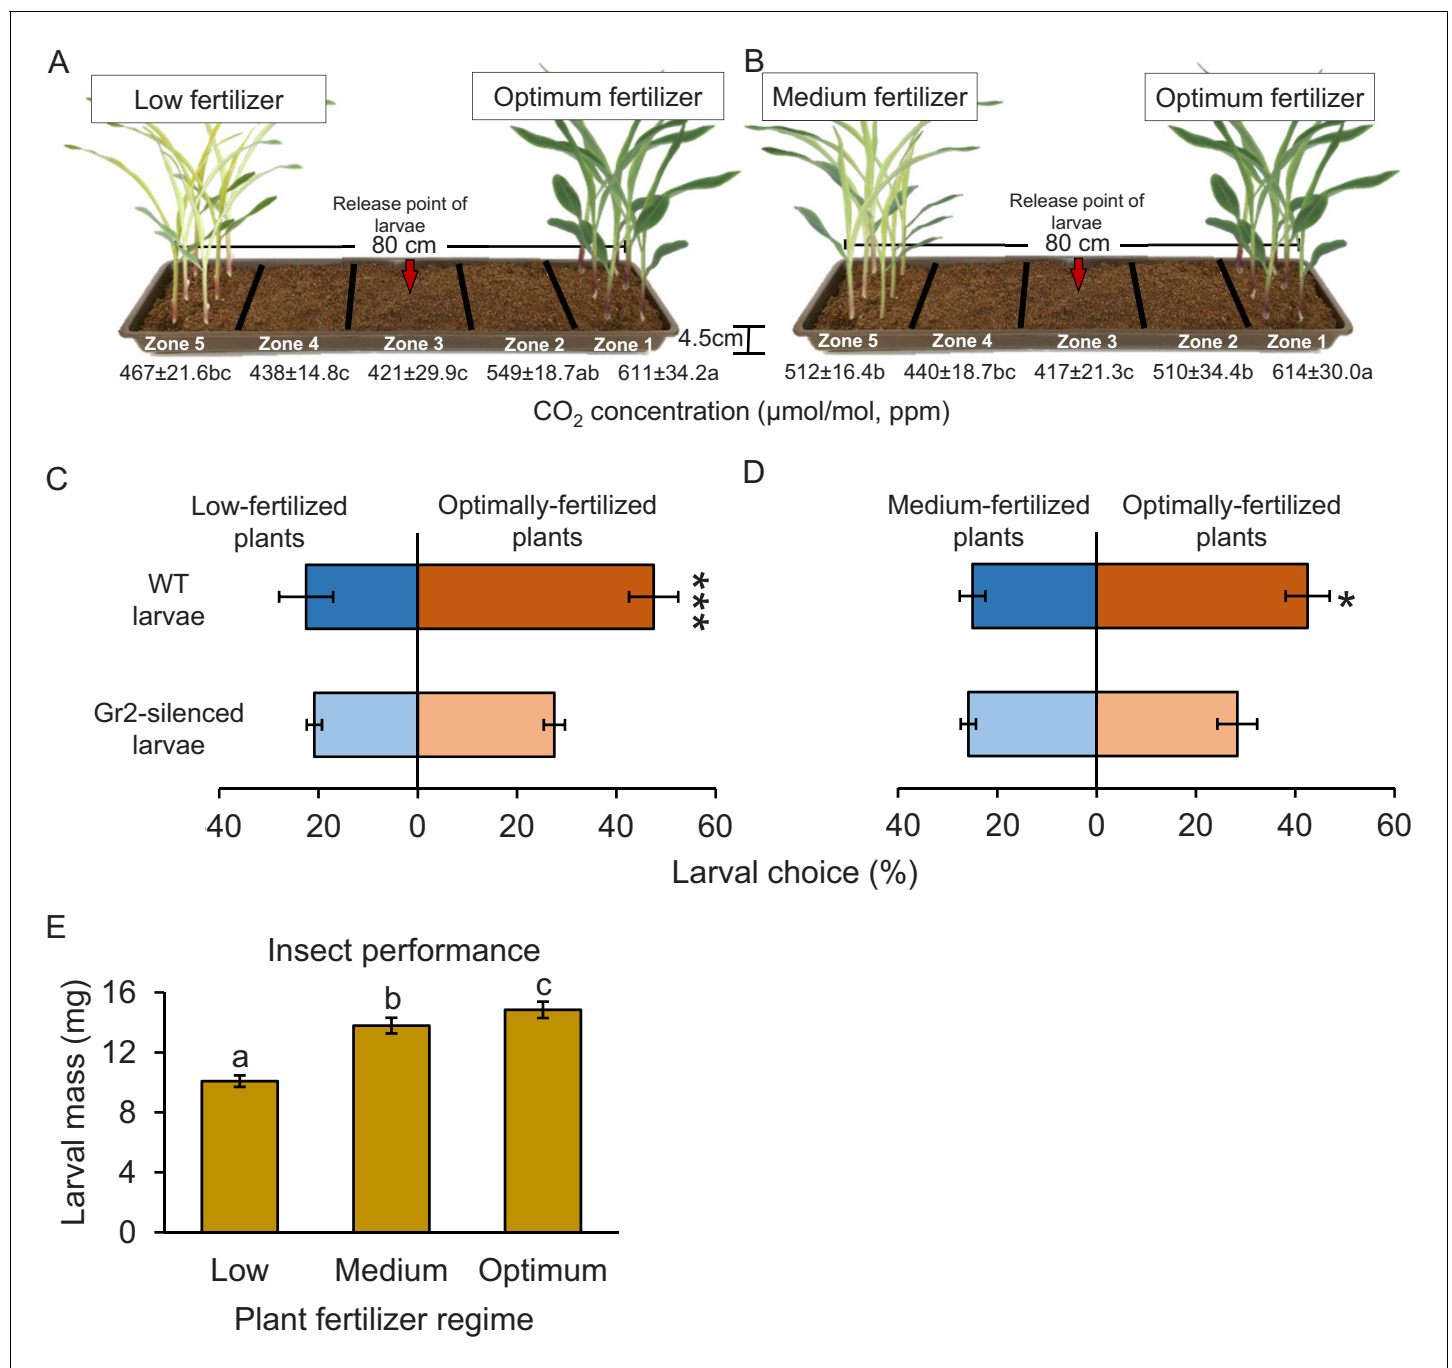

**Figure 8.** CO<sub>2</sub> perception increases the location of more suitable host plants. (A, B) Schematic representation (photomontage) of soil-filled trays used to evaluate location of differentially fertilized plants by western corn rootworm (WCR) larvae depicting mean ( $\pm$  SEM) CO<sub>2</sub> levels detected in the soil gas phase of each tray zone ( $n = 10$ ). Different letters indicate statistically significant differences in CO<sub>2</sub> levels ( $p < 0.05$  by one-way ANOVA with Holm's multiple-comparisons test). For details regarding CO<sub>2</sub> levels, refer to **Figure 8—figure supplement 1**. Mean ( $\pm$  SEM) proportion of WCR larvae recovered close to plants that received low (zone 5) or optimum (zone 1) fertilizer doses (C), or that were recovered close to plants that received medium (zone 5) or optimum (zone 1) fertilizer doses (D) 8 hr after releasing the larvae. Six trays with 20 larvae per tray were assayed ( $n = 6$ ). Different letters indicate statistically significant differences in larval preferences ( $*p < 0.05$ ;  $***p < 0.001$  by generalized linear model followed by FDR-corrected post hoc tests). (E) Mean ( $\pm$  SEM) weight of WCR larvae after 7 days feeding on plants fertilized with low, medium, or optimum fertilizer doses. Twenty solo cups with 4–7 larvae each were assayed ( $n = 20$ ). Different letters indicate statistically significant differences in larval mass ( $p < 0.05$  by one-way ANOVA followed by Holm's multiple-comparisons tests). For details regarding the statistical results, refer to **Supplementary file 1**. Raw data are available in **Figure 8—source data 1**.

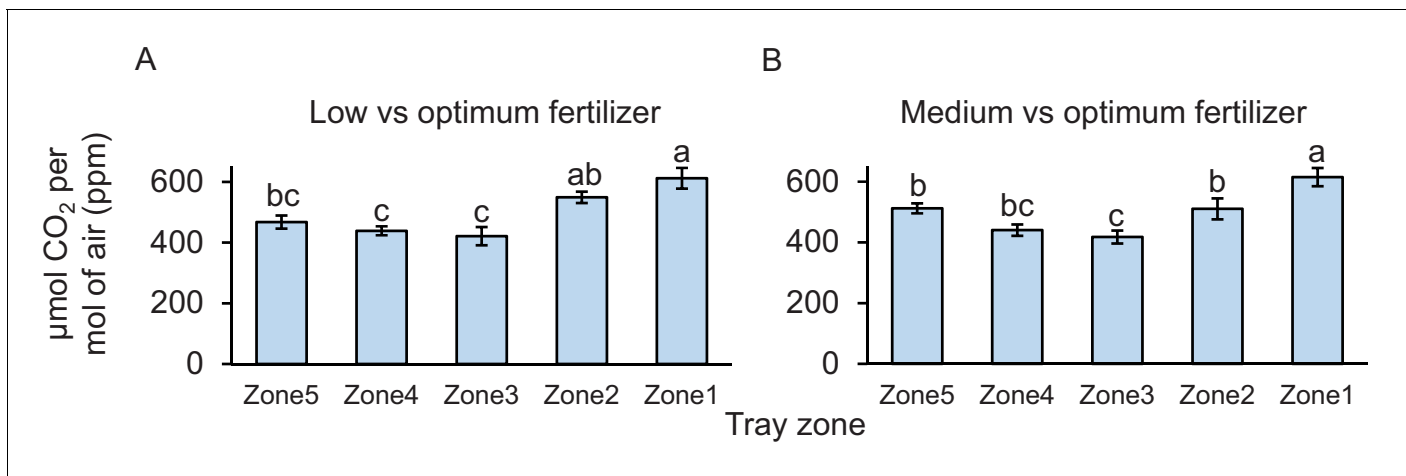

**Figure 8—figure supplement 1.** Carbon dioxide levels at different sampling points. (A, B) Mean ( $\pm$  SEM) CO<sub>2</sub> levels detected in the soil gas phase of each tray zone ( $n = 10$ ). Different letters indicate statistically significant differences in CO<sub>2</sub> levels ( $p < 0.05$  by one-way ANOVA with Holm's multiple-comparisons test).
