# Supplementary material for: Plant-associated CO2 mediates long-distance host location and foraging behaviour of a root herbivore
Source: eLife. 2021 Apr 20;10:e65575. doi: 10.7554/eLife.65575 (PMC8057813; doi:10.7554/eLife.65575)
Supplement: Supplementary file 1. [file elife-65575-supp1.xlsx]

## Sheet: Statistical results
Figure	Sample size	Number of larvae per treatment	Total number of larvae	Variable	Statistical Test	Factor (s)	P value
Figure 1CD	3 trays (n=3)	-	-	CO2 levels	Two-way ANOVA, Holm’s multiple comparisons test	Tray position where air samples were taken (TP)	<0.001
						Presence of plant in the tray (PP)	<0.001
						TP*PP	<0.001
Figure 2BCD	10 samples with 3-7 larvae each (n=10)	30-70	30-70	DvvGr1 gene expression	Student’s t test	Larval tissue	<0.001
				DvvGr2 gene expression		Larval tissue	<0.001
				DvvGr3 gene expression		Larval tissue	0.219
Figure 3A	11-13 samples with 3-7 larvae each (n=11-13)	33-91	33-91	DvvGr1 gene expression	One-way ANOVA, Holm’s multiple comparisons test	Silencing construct fed to larvae	<0.001
				DvvGr2 gene expression		Silencing construct fed to larvae	<0.001
				DvvGr3 gene expression		Silencing construct fed to larvae	0.005
Figure 3B	3-4 samples per olfactometer side (n=3-4)	-	-	CO2 levels	Student’s t test	Olfactometer side where air was sampled	0.024
Figure 3-figure supplement 1	3-8 samples per olfactometer side (n=3-4)	-	-	CO2 levels	One-way ANOVA, Holm’s multiple comparisons test	Air sampling point	0.015
Figure 3C	7 olfactometers per larval type with six larvae each (n=7)	42	168	Larval choice	Generalized Linear Models (GLM) with binomial distribution, FDR-corrected Least Square Means post hoc tests	Silencing construct fed to larvae (SC)	0.8942
						Olfactometer side (OS)	<0.001
						SC*OS	<0.001
Figure 3E	10 Petri dishes per larval type with five larvae each (n=10)	50	100	Larval choice	Generalized Linear Models (GLM) with binomial distribution, FDR-corrected Least Square Means post hoc tests	Silencing construct fed to larvae (SC)	0.8953
						Olfactometer side (OS)	<0.001
						SC*OS	0.9088
Figure 3F	20 Petri dishes per larval type with six larvae each (n=20)	120	240	Larval choice	Generalized Linear Models (GLM) with binomial distribution, FDR-corrected Least Square Means post hoc tests	Silencing construct fed to larvae (SC)	0.516
						Olfactometer side (OS)	<0.001
						SC*OS	0.5494
Figure 3G	20 Petri dishes per larval type with six larvae each (n=20)	120	240	Larval choice	Generalized Linear Models (GLM) with binomial distribution, FDR-corrected Least Square Means post hoc tests	Silencing construct fed to larvae (SC)	0.5785
						Olfactometer side (OS)	<0.001
						SC*OS	0.9002
Figure 4B, Figure 4-figure supplement 1	3 olfactometers per larval type and CO2 dose (n=3)	-	-	CO2 levels	Generalized Linear Models (GLM) with binomial distribution, FDR-corrected Least Square Means post hoc tests	Silencing construct fed to larvae (SC)	<0.001
						Olfactometer side (OS)	<0.001
						CO2 dose (D)	<0.001
						SC*OS	0.6087
						SC*D	0.4813
						OS*D	<0.001
						SC*OS*D	0.8983
Figure 4B	3 olfactometers per larval type and CO2 dose with six larvae each (n=3)	18	396	Larval choice	Generalized Linear Models (GLM) with binomial distribution, FDR-corrected Least Square Means post hoc tests	Silencing construct fed to larvae (SC)	0.7746
						Olfactometer side (OS)	0.2519
						CO2 dose (D)	1
						SC*OS	0.7721
						SC*D	0.9992
						OS*D	<0.001
						SC*OS*D	<0.001
Figure 5C	6 Petri plates with one larvae each (n=6)	6	12	Mean speed	Student’s t test	Silencing construct fed to larvae	0.635
				Crawled distance		Silencing construct fed to larvae	<0.001
				Time spent on CO2 source		Silencing construct fed to larvae	<0.001
Figure 5F	6 Petri plates with one larvae each (n=6)	6	12	Mean speed		Silencing construct fed to larvae	0.69
				Crawled distance		Silencing construct fed to larvae	0.963
				Time spent to reach roots		Silencing construct fed to larvae	0.676
Figure 6AB	4 olfactometers per larval type, arm size, and CO2 scrubber combination with six larvae each (n=4)	24	48	Larval choice	Generalized Linear Models (GLM) with binomial distribution, FDR-corrected Least Square Means post hoc tests	Olfactometer arm size (OAS)	0.1806
						Presence of CO2 scrubber (S)	0.9178
						Silencing construct fed to larvae (SC)	0.9178
						Olfactometer side (OS)	<0.001
						OAS*S	0.9139
						OAS*SC	0.594
						S*SC	0.9143
						OAS*OS	<0.001
						S*OS	0.1052
						SC*OS	0.2892
						OAS*S*SC	0.9348
						OAS*S*OS	0.2154
						OAS*SC*OS	0.5762
						S*SC*OS	0.0368
						OAS*S*SC*OS	0.0965
Figure 6AB, Figure 6-figure supplement 1	4 samples per olfactometer side (n=4)	-	-	CO2 levels	Generalized Linear Models (GLM) with binomial distribution, FDR-corrected Least Square Means post hoc tests	Olfactometer arm size (OAS)	0.97045
						Presence of CO2 scrubber (S)	<0.001
						Silencing construct fed to larvae (SC)	0.029
						Olfactometer side (OS)	<0.001
						OAS*S	0.3317
						OAS*SC	0.5491
						S*SC	0.0669
						OAS*OS	0.3439
						S*OS	<0.001
						SC*OS	0.5959
						OAS*S*SC	0.0705
						OAS*S*OS	0.579
						OAS*SC*OS	0.2855
						S*SC*OS	0.8724
						OAS*S*SC*OS	0.2072
Figure 6-figure supplement 2	Five spherical pots per treatment (n=5)	-	-	Compound concentration	Student’s t test	Presence of CO2 scrubber	>0.05
Figure 7A	3 trays per larval type with twenty larvae each (n=3)	60	120	Proportion of larvae in each tray zone	Generalized Linear Models (GLM) with binomial distribution, FDR-corrected Least Square Means post hoc tests	Silencing construct fed to larvae (SC)	1
						Tray zone (TZ)	0.9827
						SC*TZ	0.9997
Figure 7B, figure 7-figure supplement 1	3-4 samples per tray zone (n=3-4)	-	-	CO2 levels	One-way ANOVA, Holm’s multiple comparisons test	Air sampling point	<0.001
Figure 7CDEF	6 trays per larval type and distance combination with twenty larvae each (n=6)	120	960	Proportion of larvae in each tray zone	Generalized Linear Models (GLM) with binomial distribution, FDR-corrected Least Square Means post hoc tests	Release point of larvae (RP)	1
						Silencing construct fed to larvae (SC)	1
						Tray Zone (TZ)	<0.001
						RP*SC	1
						RP*TZ	<0.001
						SC*TZ	<0.001
						RP*SC*TZ	0.322
Figure 7-figure supplement 2	Five trays per larval type with twenty five larvae each (n=5)	125	250	Proportion of larvae close to roots	Two-way repeated measurements ANOVA, Holm’s multiple comparisons test	Silencing construct fed to larvae (SC)	<0.001
						Time (T)	<0.001
						SC*T	<0.001
Figure 8A, figure 8-figure supplement 1A	10 samples per tray zone (n=10)	-	-	CO2 levels	One-way ANOVA, Holm’s multiple comparisons test	Air sampling point	<0.001
Figure 8B, figure 8-figure supplement 1B	10 samples per tray zone (n=10)	-	-	CO2 levels	One-way ANOVA, Holm’s multiple comparisons test	Air sampling point	<0.001
Figure 8C	6 trays per larval type with twenty larvae each (n=6)	120	240	Larval choice	Generalized Linear Models (GLM) with binomial distribution, FDR-corrected Least Square Means post hoc tests	Silencing construct fed to larvae (SC)	<0.01
						Tray Zone (TZ)	<0.001
						SC*TZ	0.0639
Figure 8D	Six trays per larval type with twenty larvae each (n=6)	120	240	Larval choice	Generalized Linear Models (GLM) with binomial distribution, FDR-corrected Least Square Means post hoc tests	Silencing construct fed to larvae (SC)	0.1121
						Tray Zone (TZ)	0.0167
						SC*TZ	0.0966
Figure 8E	Twenty solo cups with four to seven larvae each per fertilizer regime (n=20)	60-140	314	Larval mass	One-way ANOVA, Holm’s multiple comparisons test	Fertilizer regime used to grow the plants fed to larvae	<0.001
